## RESEARCH ARTICLE

# Categorisation of culturable bioaerosols in a fruit juice manufacturing facility

Shirleen M. Theisinger, Olga de Smidt<sup>1</sup>\*, Jan F. R. Lues

Centre for Applied Food Sustainability and Biotechnology (CAFSaB), Faculty of Health and Environmental Sciences, Central University of Technology, Free State, Bloemfontein, South Africa

\* [odesmidt@cut.ac.za](mailto:odesmidt@cut.ac.za)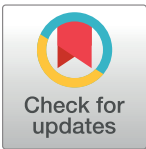

## Abstract

Bioaerosols are defined as aerosols that comprise particles of biological origin or activity that may affect living organisms through infectivity, allergenicity, toxicity, or through pharmacological or other processes. Interest in bioaerosol exposure has increased over the last few decades. Exposure to bioaerosols may cause three major problems in the food industry, namely: (i) contamination of food (spoilage); (ii) allergic reactions in individual consumers; or (iii) infection by means of pathogenic microorganisms present in the aerosol. The aim of this study was to characterise the culturable fraction of bioaerosols in the production environment of a fruit juice manufacturing facility and categorise isolates as harmful, innocuous or potentially beneficial to the industry, personnel and environment. Active sampling was used to collect representative samples of five areas in the facility during peak and off-peak seasons. Areas included the entrance, preparation and mixing area, between production lines, bottle dispersion and filling stations. Microbes were isolated and identified using 16S, 26S or ITS amplicon sequencing. High microbial counts and species diversity were detected in the facility. 239 bacteria, 41 yeasts and 43 moulds were isolated from the air in the production environment. Isolates were categorised into three main groups, namely 27 innocuous, 26 useful and 39 harmful bioaerosols. Harmful bioaerosols belonging to the genera *Staphylococcus*, *Pseudomonas*, *Penicillium* and *Candida* were present. Although innocuous and useful bioaerosols do not negatively influence human health their presence act as an indicator that an ideal environment exists for possible harmful bioaerosols to emerge.

## OPEN ACCESS

**Citation:** Theisinger SM, de Smidt O, Lues JFR (2021) Categorisation of culturable bioaerosols in a fruit juice manufacturing facility. PLoS ONE 16(4): e0242969. <https://doi.org/10.1371/journal.pone.0242969>

**Editor:** Rashid Nazir, COMSATS University Islamabad - Abbottabad Campus, PAKISTAN

**Received:** June 30, 2020

**Accepted:** November 12, 2020

**Published:** April 21, 2021

**Copyright:** © 2021 Theisinger et al. This is an open access article distributed under the terms of the [Creative Commons Attribution License](https://creativecommons.org/licenses/by/4.0/), which permits unrestricted use, distribution, and reproduction in any medium, provided the original author and source are credited.

**Data Availability Statement:** The data underlying this study are located in SM Theisinger's PhD thesis, accessible from the institutional DSpace Repository: <http://hdl.handle.net/11462/2181>.

**Funding:** Funded by the South African National Research Foundation (NRF). The funder had no role in study design, data collection and analysis, decision to publish, or preparation of the manuscript.

**Competing interests:** The authors have declared that no competing interests exist.

## Introduction

Bioaerosols are defined as "aerosols comprising of particles of biological origin or activity which may affect living things through infectivity, allergenicity, toxicity and pharmacological or other processes [1–3]. Bioaerosols are emerging as important role players in atmospheric processes, yet they are poorly understood. What is known and is universally accepted is that bioaerosols originate from and may impact various environments. For example, bioaerosols are emitted from terrestrial sources such as soil, forests and desert dust, and from agricultural and composting activities. They are prevalent in urban areas, wetlands, as well as coastal and marine environments. Moreover, they play a key role in the dispersal of reproductive units

from plants and microbes where the atmosphere enables their dissemination over geographic barriers and long distances. Bioaerosols are thus highly relevant in the spread of organisms and they allow genetic exchange between habitats and geographic shifts of biomes. These compounds are central elements in the development, evolution and dynamics of ecosystems [4, 5]. Although bioaerosols may have beneficial characteristics, the opposite is also possible, as the dispersal of plant, animal and human pathogens as well as allergens has major implications for agricultural outcomes and public health. The negative effects that bioaerosols may have on the human respiratory system are documented [6, 7]. With research that has focused on fungal pathogens and bacterial bioaerosols represent an urgent research priority due to their role in disease outbreaks [8].

Modern industrial activities (e.g., waste sorting, organic waste collection, composting, agricultural production, food processing, raising of livestock, and wastewater treatment systems) emit large quantities of bioaerosols, and this results in the release of abundant biological agents into the air. Unfortunately, it is difficult to accurately describe bioaerosols role on the environment, especially in terms of human health [5, 9], and thus the effects that bioaerosols may have on products and food handlers in the food industry remain controversial. To exacerbate this situation, no legislation is available regarding bioaerosols in the air of food industries in South Africa. Allowable quantities of bioaerosols as proposed by the European Union have been disseminated, but there is no set standard [10]. What makes the assembly of legislation for bioaerosols so difficult is the fact that, in a specific industry, two or more manufacturing facilities might produce the same product, but the environment, other industries in close proximity, the season, the structure of the facility, and the raw materials used can differ to such an extent that the bioaerosol composition may vary considerably among these facilities [11].

In a generic food facility, major routes of food contamination by microorganisms are via surface contact, via personnel or via the air. The contamination by air is noteworthy for products such as beverages, refrigerated dairy and culinary products [12]. Monitoring bioaerosols in the food industry environment is one of the many tools that industrial quality control managers can use in the assessment of indoor air quality, agricultural outcomes, and industrial health. The monitoring process should include: (i) sampling of bioaerosols using either passive or active sampling methods; (ii) measurement of viable (culturable and non-culturable) and non-viable bioaerosols; and (iii) the identification of bioaerosols. Identification of microbial taxa is a critical element in the determination of the bioaerosol load in an industrial environment. Identification of bioaerosols can be performed using a variety of available assessment strategies such as microscopy, immuno-assays as well as various molecular-based assays [13–15]. The sensitivity and rapidity of molecular techniques have also led to their use for bioaerosol monitoring in the determination of air quality and the detection of airborne pathogens [9, 16].

The air in food industries can be packed with various airborne microorganisms that may include bacteria, yeast and mould [9, 17]. The contribution of airborne microorganisms to food contamination has been addressed, although aerosols in food plants have not been studied sufficiently too accurately generalise particle distribution [18]. The compilation of organisms in the air depends on the industry, the facility, the capacity of the facility, as well as the season and the external environment. Airborne microorganisms are a potential source of a wide variety of public and industrial health hazards; however, it is difficult to compile a set standard of acceptable limits for a specific industry as information regarding; due to difference in samplers, collection time, airflow rate, analysis method and the types of bioaerosols and their effects is not abundant [8, 11]. With limited information the aim of this study was to characterise the culturable fraction of bioaerosols sampled during peak and off-peak seasons in a fruit juice manufacturing facility and categorise isolates as harmful, innocuous or potentially beneficial to the industry, the personnel and the environment.

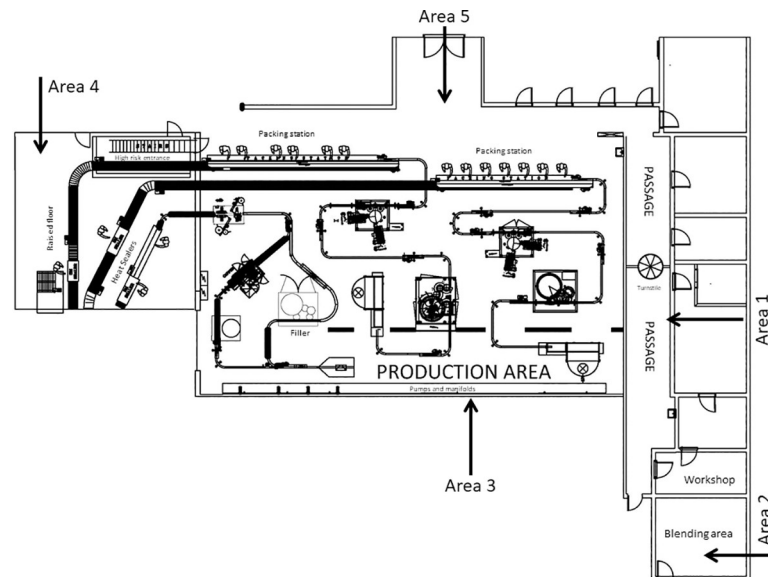

**Fig 1. Schematic layout of the fruit juice manufacturing facility.** Different sampling areas: Area 1 (entrance to the production area), Area 2 (preparation and mixing of materials), Area 3 (between the production lines), Area 4 (dispersion of bottles) and Area 5 (filling of bottles with the final product).

<https://doi.org/10.1371/journal.pone.0242969.g001>

## Materials and methods

### Sampling

Two SAMPL’AIR LITE (AES Chemunex, United States) samplers were used to collect culturable bioaerosols in a HACCP certified fruit juice manufacturing facility in Bloemfontein, South Africa. A purposive sampling methodology was utilised [18] that was appropriate for the selected peak and off-peak manufacturing seasons according to which the facility operated. All sampling was performed in duplicate in the entrance to the production area (Area 1), the preparation and mixing area of materials (Area 2), the area between the production lines (Area 3), the area for the dispersion of bottles (Area 4), and the area where the bottles were filled with the final product (Area 5) (Fig 1).

The air samplers that were used operated at a flow rate of 100 L per minute and were disinfected with ethanol between the different sampling points. The samplers were switched on for 2 min prior to sampling to allow the ethanol to evaporate, thereby avoiding interference with the quantities of microorganisms recovered. Air samples were taken at a height of 1.5 m from the ground [19, 20], which was the same level as the working stations in the centre of each area. Sterile petri dishes containing either non-selective or selective media were used (Table 1). After a sampling time of 5 min, the samplers were switched off and the petri dishes were

**Table 1. Media, incubation time and temperature.**

| Enumeration Conditions for Different Microorganisms |                                                                                    |                 |             |
|-----------------------------------------------------|------------------------------------------------------------------------------------|-----------------|-------------|
| Microorganisms                                      | Media                                                                              | Incubation Time | Temperature |
| Total microbial load                                | PCA (plate count agar)                                                             | 72 h            | 30°C        |
| Yeast and mould                                     | RBC (Rose Bengal Chloramphenicol agar)                                             | 72–120 h        | 25°C        |
| Coliforms and <i>E. coli</i>                        | VRB (Violet Red Bile agar) with MUG (4-Methylumbelliferyl- $\beta$ -D-Glucuronide) | 24 h            | 37°C        |
| <i>Salmonella</i> spp.                              | XLD (Xylose Lysine Deoxycholate agar)                                              | 24 h            | 37°C        |
| <i>Staphylococcus</i> spp.                          | BPA (Baird-Parker agar)                                                            | 48 h            | 37°C        |

<https://doi.org/10.1371/journal.pone.0242969.t001>

removed and inverted in their covers. True temperature was determined using a heat stress monitor IQuestemp SA) and a rotating vane anemometer was used for the measurement of air velocity and volume flow. At least two independent repeats were conducted in each sampling area.

### Culture medium composition used for microbe cultivation, enumeration and isolation

Active air samples collected on the petri dishes containing the non-selective and selective media were incubated for a specific time at specific temperatures [5] (Table 1).

Selective media are predominantly used for the growth of selected microorganisms. Microbial counts were performed using standard guidelines adapted from *The Compendium of Methods for the Microbiological Examination of Foods* [21, 22]. After incubation, the number of colonies on each plate was counted using the Scan® 1200 high-resolution automatic colony counter. The colony counts were adjusted using the positive hole correction method based on Feller's statistical correlation equation [23, 24] and reported as CFU.m<sup>-3</sup>. Individual presumptive bacterial colonies were selected with a sterile inoculation loop and preserved in 2 ml Microbanks (ProLab) at -80°C. Yeast and mould colonies were stored in 1.8 ml Nunc® Cryo-Tubes® containing 1 ml sterile 15% glycerol at -80°C.

### Identification of the culturable fraction of bacteria, yeast and mould

Pure cultures of bacteria, yeast and mould were selected from 18 to 72 h agar plates based on colony colour, morphology and cell characteristics using a microscope [25, 26]. Selected colonies were purified onto fresh agar plates and whole cells used for PCR identification. Primer set 63F (5' -CAG GCC TAA CAC ATG CAA GTC-3') and 1387R (5' -GGG CGG WGT GTA CAA GGC-3') were used to target ≈1 300 bp of the 16S rRNA gene for bacterial identification [27]. Primers NL1 (5' -GCA TAT CAA TAA GCG GAG GAA AAG-3') and NL4 (5' -GGT CCG TGT TTC AAG ACG G-3') were used for the amplification of the D1/D2 domain of the 26S rRNA gene (≈600 bp) of yeasts [28, 29]. For mould identification, a PCR-mediated reaction was performed targeting the ≈600 bp internal transcribed spacer region (ITS1, ITS2) using primers ITS1 (5' -TCC GTA GAA CCT GCG g-3') and ITS4 (5' -TCC TCC GCT TAT TGA TAT GC-3') (Integrated DNA Technologies, Inc.) [30–32].

Whole cells from a pure culture suspension (20 µl) were used as template DNA. The PCR was carried out in a total volume of 50 µl, containing 1X ThermoPol® reaction buffer (20 mM Tris-HCl, 10 mM (NH<sub>4</sub>)<sub>2</sub>SO<sub>4</sub>, 10 mM KCl, 2 mM MgSO<sub>4</sub>, 0.1% Triton®-X-100, pH 8.8 @ 25°C), 0.2 mM dNTPs, 0.52 µM of each primer and 1 unit of Taq DNA polymerase (New England Biolabs). PCR reaction conditions included an initial denaturation cycle of 3 min at 95°C, followed by 30 cycles of denaturation at 95°C, annealing at 55°C for 30 sec and elongation at 68°C for 60–90 sec. A final elongation cycle was performed at 68°C for 6 min. PCR products were separated on a 1% agarose gel, stained with 0.05% Ethidium bromide, and visualised using UV light. Digital images were captured with the Molecular Imager® Gel Doc™ XR system (BioRad Laboratories, Inc.).

After purification using the Diffinity RapidTip®2 (Sigma), both forward and reverse primers were used for sequencing in separate reactions [4]. Sequencing was performed using the ABI Prism 3130 XL genetic analyser and the Big Dye® Terminator V3.1 Cycle Sequencing Kit (Applied Biosystems). DNA was precipitated with EDTA and ethanol. Contigs of forward and reverse sequence results were assembled using DNA Baser v5.15.0 sequence assembly software and compared with sequences accessible in the GenBank database using the BLAST algorithm (megablast) [4, 33]. Sequences with high similarity were then subjected to multiple sequence alignments using Clustal Omega (EMBL-EBI) for identification [34]. Only similarities with a

BLAST index of 97% and above were considered for identification [35]. Sequence data for isolates considered harmful were deposited into the National Center for Biotechnology Information (NCBI) Genbank database. Genbank accession numbers were included in Table 4.

## Results and discussion

### Culturable fraction identified during peak and off-peak sampling

Airborne microorganisms occur ubiquitously in ambient air [36] and are naturally part of the air in almost any environment. These microbes can originate, not only from humans, but are also spawned by various indoor characteristics (such as ventilation, heating and air conditioning systems) and outdoor environmental sources. Although airborne microorganisms encountered in indoor facilities are still deemed innocuous for healthy individuals, they can cause adverse health effects when high counts are ingested or inhaled [37, 38]. Moreover, bioaerosols are easily translocated from one ecosystem to another by wind and air currents, thus making them an important vehicle for the spread of potentially pathogenic organisms [39]. When associated with dust particles or condensation droplets, these organisms can be dispersed among different areas in a food processing unit. International food industries are required by authorities such as the Food and Drug Administration (FDA) to take measures to reduce product contamination by airborne microorganisms [40, 41].

Bacteria, yeast and mould are the main groups of microorganisms categorised as potential pathogenic airborne microorganisms. Bacteria, yeast and mould have been identified in various food industries as bioaerosols. These industries include dairy processing facilities [42], poultry slaughtering facilities [43], automated chicken egg production facilities [44], and bakeries [45]. During our study we isolated a total of 239 bacteria and 41 yeasts and 43 moulds from the air in the production environment of the fruit juice manufacturing facility. An overview of these bioaerosols is presented as a distribution tree where the bacteria, yeast and mould are classified into different phylogenetic orders (Figs 2 and 3). From the isolates obtained, 86 different species belonging to 15 different taxonomic orders representing five bacteria and ten yeast and mould orders were identified.

Bacteria are the most abundant and diverse group of organisms [46] and are ubiquitous in every habitat on Earth. They can be present in soil, water and organic matter as well as in live bodies of plants and animals. A number of bacterial species presence in indoor environments is mostly related to human occupancy and type of indoor environment [47]. Moreover, bacteria are abundant in the atmosphere where they often represent a major portion of organic aerosols [48]. Even though bacteria were represented by a smaller group of orders in this study, they represented 62 different species.

It was immediately visible in Fig 3 that many bioaerosols detected in the facility probably originated from soil and plant roots, wetlands and ponds, and human skin. Many species that were detected had no specific significance; however, a reasonable quantity could be considered as pathogenic, specifically in the order Bacillales that is antibiotic resistant. Mainly fungal isolates and one *Pseudomonas* have previously been described as bioaerosols. Only four fungal and two bacterial isolates have previously been associated with food poisoning/spoilage.

All species found in the order Actinomycetales are found in soil and plant roots. Of these species, *Micrococcus* seems to be a predominant species in indoor air [47, 49]. The order Pseudomonadales was represented by the genera *Acinetobacter* spp., *Psychrobacter* spp. and *Pseudomonas* spp., most of which are found in soil, plant roots, wetlands and ponds. Evidence indicates that bioaerosol agents such as *Pseudomonas* spp. cause occupational health threats to immuno-compromised patients [50]. *Psychrobacter faecalis* is one species of this order that was discovered in a bioaerosol originating from pigeon faeces [51].

|                                                                                   |                                        |                                                                                   |                                                                                                      |
|-----------------------------------------------------------------------------------|----------------------------------------|-----------------------------------------------------------------------------------|------------------------------------------------------------------------------------------------------|
|  | Dead organic matter                    |  | Actinobacterium                                                                                      |
|  | Found in soil and plant roots          |  | Anti-oxidant, anti-tumor and anti-carcinogenic activities                                            |
|  | Food                                   |  | Biosynthesis, biodegradation, biomedical application, biological control, biocontrol, bioremediation |
|  | Found in the bathroom                  |  | Food making                                                                                          |
|  | Found in Spacecraft room               |  | Nitrogen fixation and plant growth promotions                                                        |
|  | Found on the skin of mammals and birds |  | Patent degrade environmental pollution                                                               |
|  | Hospital environment                   |  | Produce antibiotics                                                                                  |
|  | In humans                              |  | Antibiotic resistant, antifungal resistant                                                           |
|  | In pillows                             |  | Dairy spoilage                                                                                       |
|  | Lives on human skin                    |  | Food spoilage                                                                                        |
|  | Lives on wild animal skin              |  | Pathogen                                                                                             |
|  | Normal flora of female genital tract   |  | Plant pathogen                                                                                       |
|  | Wetlands and ponds                     |  | Bioaerosols                                                                                          |
|  | Wounds and blood                       |                                                                                   |                                                                                                      |
|  | Are not sure where comes from          |                                                                                   |                                                                                                      |
|  | No specific meaning                    |                                                                                   |                                                                                                      |

**Fig 2. Symbol key.** These symbols are used in Fig 3 to link the microorganisms to their possible origins (from ‘Dead organic matter’ to ‘Wounds and blood’), interest (from ‘Not sure where it comes from’ to ‘No specific meaning’), and importance (from ‘Actinobacterium’ to ‘Bioaerosols’).

<https://doi.org/10.1371/journal.pone.0242969.g002>

The order Lactobacillales represents a morphologically, metabolically and physiologically diverse group of bacteria [52]. In the current study only one genus, *Aerococcus*, with two different species was identified. Both these species are classified as pathogenic. They are prevalent in hospital environments and can form biofilms [53]. The order Bacillales represents a wide variety of different species with a wide variety of origins and interests. Genera from the order Bacillales are frequently found to be part of bioaerosols, because genera such as *Bacillus* and *Paenibacillus* can form highly tolerant endospores that can travel long distances [47, 54]. Two main genera were identified, namely *Bacillus* and *Staphylococcus*, both known to form part of bioaerosols. They also possess pathogenic abilities and can be resistant to antibiotics [47, 50, 55, 56]. From the Enterobacteriales order, three different genera were identified, namely *Enterobacter* spp. and *Pantoea* spp. (both are found in soil and/or plant roots and in wounds and blood) as well as *Serratia* spp. (which is mostly found in bathrooms). *Pantoea agglomerans* is usually associated with plants and is seen as a bacterium of good and evil, implying it can contribute to plant growth or cause opportunistic infections in humans [57].

Eukaryotic cells are considerably more complicated than those of prokaryotic origin and are characterised by a high degree of cellular complexity (lysosomes, peroxisomes, microtubules, mitochondria, cytoskeleton, etc.), which makes the classification of these microorganisms quite difficult [58]. This may explain why yeast and mould could be classified in 10 different orders whereas only 23 different species were identified. Overgrowth of mould in the petri dishes was observed during the enumeration of the culturable fraction and lower yeast and mould counts were observed compared to total microbial load. This may also have contributed to a lower number of identified species, as the overgrowth may have prevented

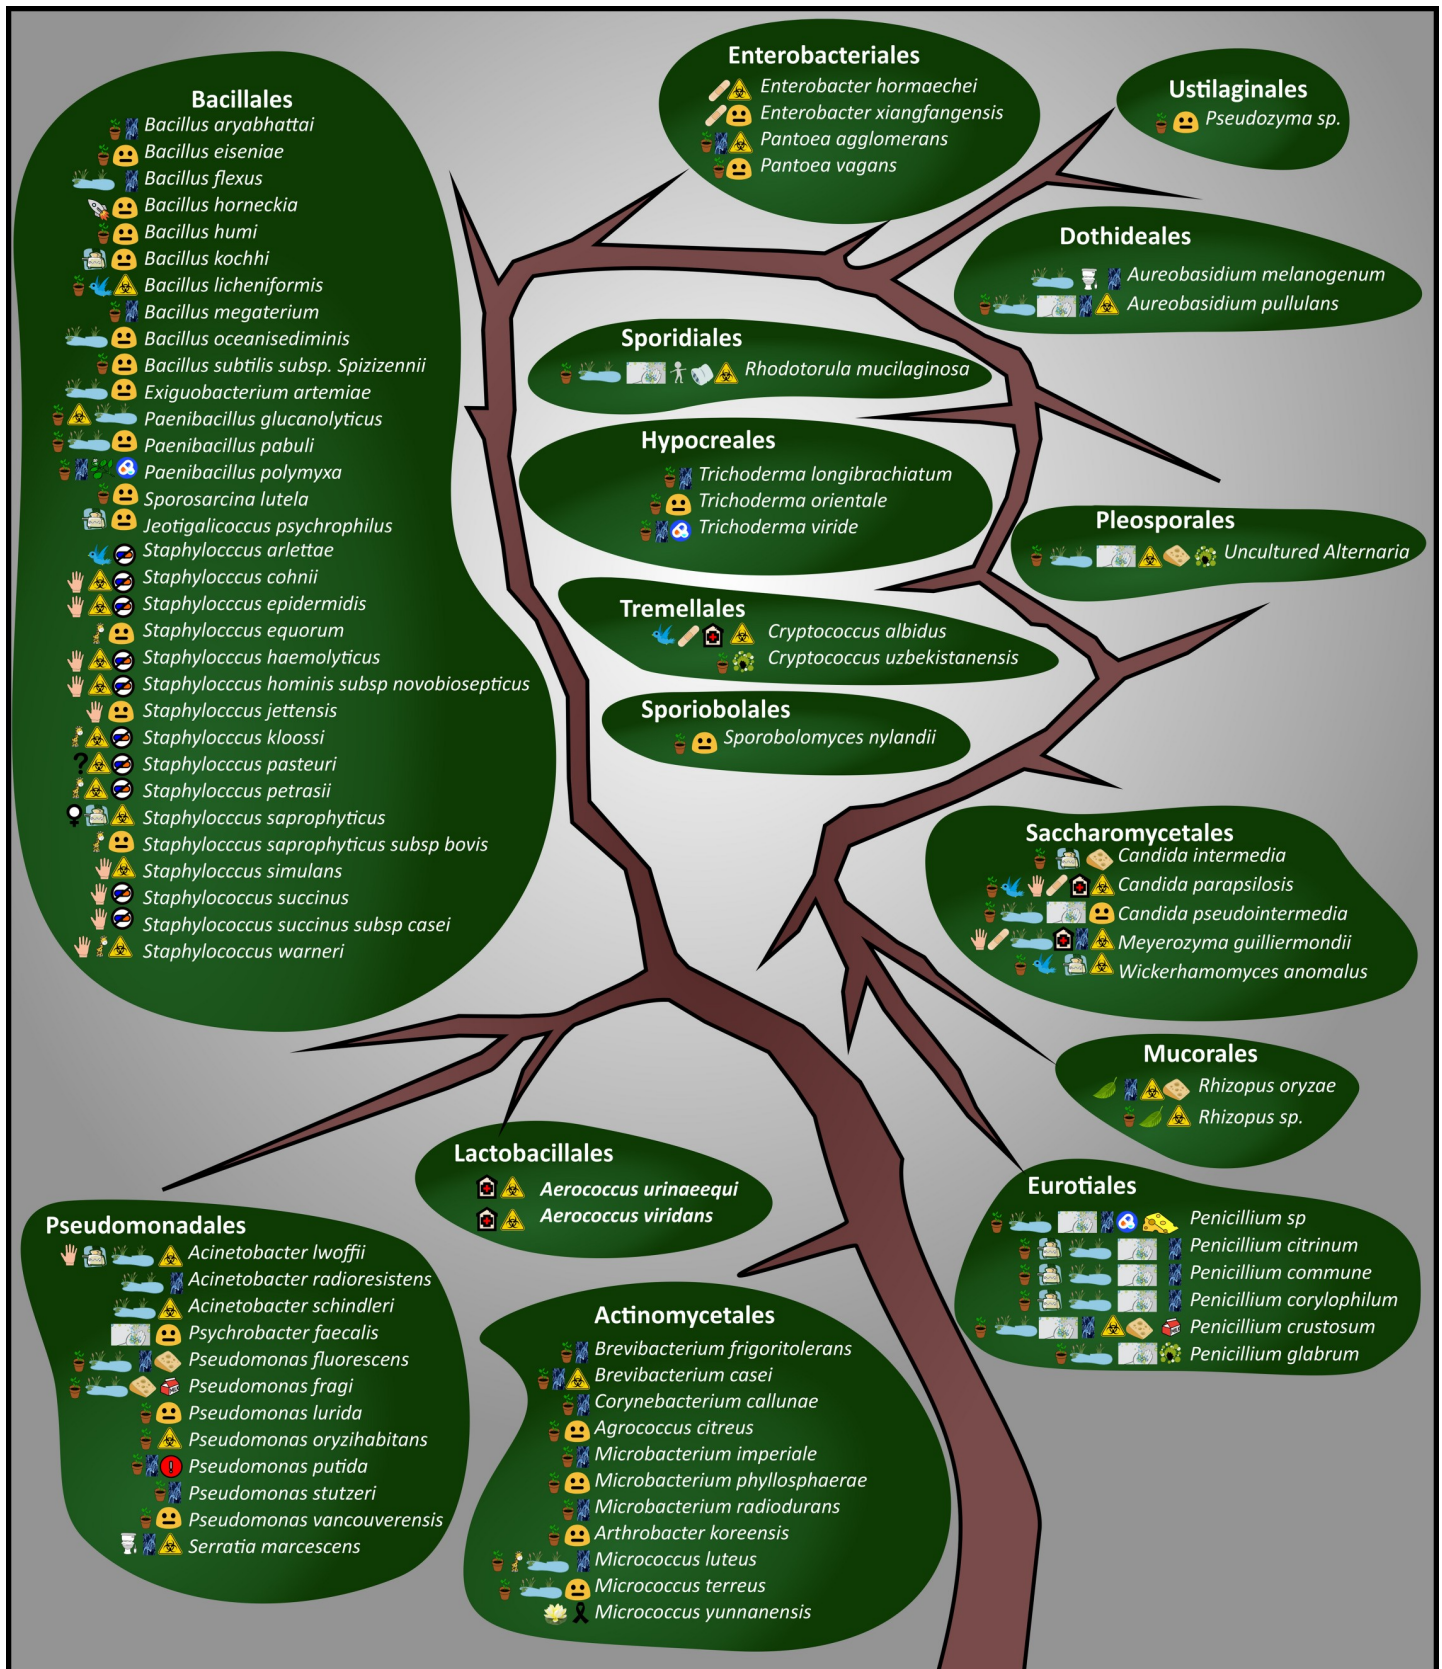

**Fig 3. Bioaerosol distribution tree.** Overview of the culturable bioaerosol fraction. As this is a distribution tree, each order is shown as different leaves and the various taxa are indicated in italics. The meaning of each symbol is outlined in Fig 2. This is not a phylogenetic tree, nor is there a specific listing order; it merely represents the total diversity detected. Microbial orders are discussed from the bottom left starting with the Actinomycetales in a clockwise direction under the two different kingdoms. The Bacillales, Pseudomonadales and Actinomycetales, and to a lesser extent the Eurotiales and Saccharomycetales orders, were the most prevalent.

<https://doi.org/10.1371/journal.pone.0242969.g003>

accurate isolation of other moulds and yeasts that could have been present [59, 60]. *Pseudozyma*, a yeast found mainly in soil and plant roots [61], was the only genus detected from the order Ustilaginales. Of the order Dothideales (microorganisms found mostly in soil, plant roots, wetlands and ponds), only one of the species, *Aureobasidium pullulans*, was previously classified as a bioaerosol [62].

Pleosporales is the largest order in the Dothideomycetes species and it comprises a quarter of all the detected Dothideomycetous species. Species in this order occur in various habitats, including bioaerosols [63]. From the Pleosporales order, one genus was detected, namely an uncultured *Alternaria* spp. that can originate from a large variety of environments such as soil plant roots, wetlands and ponds. The *Alternaria* spp. is seen as a plant pathogen; however, reports have stated that it is also prevalent in the food industry [64]. Three well known genera from the order Saccharomycetales were detected: (i) *Candida* spp. (one specific *Candida* species, *Candida pseudointermedia*, was previously identified as a bioaerosol), that originates from soil and plant roots and has the ability to cause invasive fungal infection that can have a significant impact on public health [65, 66]; (ii) *Meyerozyma guilliermondii*, which is known for its ability to live on human skin and in wounds and blood and has spoilage abilities [67]; and (iii) *Wickerhamomyces anomalus*, which is found in food and has pathogenic abilities [68]. The order Mucorales was represented by only one genus, namely a *Rhizopus* spp. This genus is mostly found in dead organic matter and has pathogenic abilities [69].

Eurotiales are widespread and abundant fungi that include the well-known genus *Penicillium*. *Penicillium* is recognised as one of the most abundant mould genera in indoor air [47, 65, 70]. Similarly, in the order Sporobolales, only one species was detected, namely *Sporobolomyces nylandii*, which is normally found in soil and/or plant roots [71]. *Cryptococcus* spp., from the order Tremellales, were also identified. These species are known to have either human or plant pathogenic abilities and have been identified as bioaerosols [65, 72]. From the Hypocreales order three different *Trichoderma* spp. were detected, and all originate from soil and/or plant roots [73–75]. From the Sporidiales order only *Rhodotorula mucilaginosa* was identified. This organism is found in soil, plant roots, wetlands, ponds, and in humans and on/in pillows. *Rhodotorula mucilaginosa* has been receiving increased attention because it can be isolated from extreme ecosystems and has the capability to survive and grow in many unfavourable conditions. It is also classified as a bioaerosol and a human pathogen [76].

Various microorganisms that were detected support the existing scientific literature that indoor exposure to microorganisms poses a risk for asthma and allergies among occupants of indoor facilities [77]. It is undeniable that microbial contamination of a facility has the potential to affect the product and places the occupants at risk of developing airway difficulties. Surprisingly, little research is available with regards to these microorganisms in the food industry, especially in the fruit juice industry, and therefore it was important to clearly classify the microorganisms that were identified. This will aid in better understanding the prevalence and ecology of specific indoor air-borne bioaerosols. Furthermore, it will be a useful tool in the management and prevention of both long- and short-term problems faced in the fruit juice industrial setting [47].

### Classification of the bioaerosols detected

Bioaerosols are generated via multiple sources such as different instruments, external environments, and human activity. Bioaerosols have varying microbiological profiles depending on



their origin and reason of interest and contaminate a product produced in an industry or pose a hazard to workers [50], depending on the kind of bioaerosol that is involved. Literature classifies bioaerosols into three groups, namely: (i) innocuous [78]; (ii) useful [4]; and (iii) harmful [79]. After the identification of the culturable fraction of bioaerosols in the current study, it was concluded that 27 innocuous, 26 useful and 39 potentially harmful bioaerosols were detected. Several of these bioaerosols can be classified in more than one group depending on the environment and intended use of the facility/area.

**Innocuous bioaerosols.** Innocuous microorganisms were classified in 1985 by the European Federation of Biotechnology as “microorganisms that have never been identified as causative agents of disease in man and that offer no threat to the environment” [80]. For a microorganism to be described as environmentally safe, it should meet the following criteria: (i) be non-pathogenic to humans, animals and plants; (ii) must have a limited ability to compete; (iii) will not indirectly affect other species (by the production of toxic metabolites or biogeochemical changes); (iv) is unable to irreversibly alter equilibria between nutrients, microflora, and higher organisms; (v) is unable, in the open environment, to transfer genetic traits that can be noxious in other species; (vi) unable to cause food spoilage; and (vii) does not contribute to unwanted traits [4, 81].

We identified 27 different microorganisms as innocuous bioaerosols (Table 2). Two genera were dominant, namely *Bacillus* and *Staphylococcus*. The genus *Bacillus* includes more than 200 species, is widespread in nature and is found in virtually every environment [82]. Although the *Bacillus* species are ostensibly well-known as pathogens, the overwhelming majority are in actual fact non-pathogenic [83]. The *Staphylococcus* species are reported as normal microbiota of mammals and birds; however, certain species are important pathogens in humans and animals. It is noteworthy that little is known about the *Staphylococcus* species that are non-pathogenic environmental microorganisms [84].

Only 4 innocuous yeasts and moulds were detected. Although yeast and mould are well-known for their fermentation ability and pharmaceutical properties, it has been found that they are microorganisms that do more harm than good in food and food-related industries [85–88].

Although these microorganisms would have been innocuous to the products, the workers in the facility and the environment, they still formed part of the bioaerosols detected during bioaerosol sampling. The high microbial counts that were observed during sampling immediately created the inaccurate assumption that the air was contaminated with hazardous or unsafe bioaerosols [109]. Therefore, simply analysing bioaerosols for total heterotrophic counts, as specified by certain countries to determine air quality, could be considered a shortcoming [110].

**Useful bioaerosols.** Useful microorganisms are generally: (i) environmentally beneficial; (ii) useful in food; (iii) making positive medical contributions; and (iv) biotechnologically advantageous. For example, the use of beneficial/useful microorganisms contributes positively towards environmentally safe agricultural products. The modes of action of these useful microorganisms and their various benefits to plants range from the simple occupation of biological empty spaces to ecological relationships such as antibiosis, competition, predation, and symbiosis, among others [111]. Other beneficial microorganisms represent an important biotechnological approach to decrease the deleterious effects of stress in crops [112, 113]. Studies have also indicated that the growth-promoting ability of some bacteria to synthesise extracellular polysaccharides or exopolysaccharides has commercially significant applications [114].

The use of beneficial microorganisms can potentially revolutionise agriculture and food industries by: (i) integrating crop health with better management practices for specific climatic conditions to improve productivity and quality; (ii) using environmentally friendly approaches to control pests and pathogens, thus reducing the use of chemical pesticides with

Table 2. Innocuous bioaerosols detected and classified alphabetically from order to species.

| Innocuous Bioaerosols–Bacteria |                    |                                                  |           |
|--------------------------------|--------------------|--------------------------------------------------|-----------|
| Order                          | Family             | Genus and Specie                                 | Reference |
| Actinomycetales                | Brevibacteriaceae  | <i>Agrococcus citreus</i>                        | [89]      |
| Actinomycetales                | Microbacteriaceae  | <i>Microbacterium phyllosphaerae</i>             | [90]      |
| Actinomycetales                | Micrococcaceae     | <i>Arthrobacter koreensis</i>                    | [91]      |
| Actinomycetales                | Micrococcaceae     | <i>Micrococcus terreus</i>                       | [92]      |
| Bacillales                     | Bacillaceae        | <i>Bacillus eiseniae</i>                         | [82]      |
| Bacillales                     | Bacillaceae        | <i>Bacillus horneckiae</i>                       | [93]      |
| Bacillales                     | Bacillaceae        | <i>Bacillus humi</i>                             | [94]      |
| Bacillales                     | Bacillaceae        | <i>Bacillus kochii</i>                           | [95]      |
| Bacillales                     | Bacillaceae        | <i>Bacillus oceanisediminis</i>                  | [92]      |
| Bacillales                     | Bacillaceae        | <i>Bacillus subtilis subsp. spizizenii</i>       | [83]      |
| Bacillales                     | Bacillaceae        | <i>Exiguobacterium artemia</i>                   | [96]      |
| Bacillales                     | Paenibacillaceae   | <i>Paenibacillus pabuli</i>                      | [97]      |
| Bacillales                     | Planococcaceae     | <i>Sporosarcina luteola</i>                      | [98]      |
| Bacillales                     | Staphylococcaceae  | <i>Jeotgalicoccus psychrophilus</i>              | [99]      |
| Bacillales                     | Staphylococcaceae  | <i>Staphylococcus equorum</i>                    | [100]     |
| Bacillales                     | Staphylococcaceae  | <i>Staphylococcus jettensis</i>                  | [101]     |
| Bacillales                     | Staphylococcaceae  | <i>Staphylococcus saprophyticus subsp. bovis</i> | [102]     |
| Enterobacteriales              | Enterobacteriaceae | <i>Enterobacter xiangfangensis</i>               | [103]     |
| Enterobacteriales              | Erwiniaceae        | <i>Pantoea vagans</i>                            | [104]     |
| Pseudomonadales                | Moraxellaceae      | <i>Psychrobacter faecalis</i>                    | [51]      |
| Pseudomonadales                | Pseudomonadaceae   | <i>Pseudomonas lurida</i>                        | [105]     |
| Pseudomonadales                | Pseudomonadaceae   | <i>Pseudomonas vancouverensis</i>                | [106]     |
| Sphingomonadales               | Sphingomonadaceae  | <i>Sphingomonas pseudosanguinis</i>              | [107]     |
| Saccharomycetales              | Saccharomycetaceae | <i>Candida pseudointermedia</i>                  | [108]     |
| Hypocreales                    | Hypocreaceae       | <i>Trichoderma orientale</i>                     | [74]      |
| Sporiobolales                  | Incertae sedis     | <i>Sporobolomyces nylandii</i>                   | [71]      |
| Ustilaginales                  | Ustilaginaceae     | <i>Pseudozyma spp.</i>                           | [61]      |

<https://doi.org/10.1371/journal.pone.0242969.t002>

environmental and health implications; (iii) producing better quality food with less chemical contamination and allergens; and (iv) minimising losses by improving crop fitness in extreme weather conditions [115].

One of the most exciting scientific advances in recent years has been the realisation that commensal microorganisms play key roles in our physiology (including protection against infection) and in drug metabolism, vitamin synthesis, nutrition, as well as in response to disease [116]. The beneficial influence of microorganisms is still on the border of its' potential and a great deal of future discoveries and technologies are anticipated. In the current study, the useful bioaerosols that were detected during the selected sampling seasons were categorised into three groups, namely: (i) medical contribution; (ii) promoting and protecting plant growth; and (iii) environmental contribution (Table 3).

Natural products (plants, animals and microorganisms) are essential, reputable resources that originate from Earth's bio-diverse flora and fauna. These natural products are encoded to be bioactive and have been used as medicines for ages. Today, they continue to be a reservoir of potential resources [141]. Recently, the global threat of anti-microbial resistance has increased the need for urgent therapeutic discoveries and the improvement of existing antimicrobial practices [142]. Numerous medical conditions are the focus of these efforts; however, one of the medical areas in which microorganisms have contributed tremendously in the last

**Table 3. Alphabetical classification of useful bioaerosols detected (peak and off-peak seasons) according to: medical contribution, promoting and protecting plant growth and environmental contribution.**

| Genus and Specie                             | Benefit                                                                                                                                                                                                                                                                                                   | Reference |
|----------------------------------------------|-----------------------------------------------------------------------------------------------------------------------------------------------------------------------------------------------------------------------------------------------------------------------------------------------------------|-----------|
| <b>Medical Contribution</b>                  |                                                                                                                                                                                                                                                                                                           |           |
| <i>Acinetobacter radioresistens</i>          | Purification and biochemical properties                                                                                                                                                                                                                                                                   | [117]     |
| <i>Bacillus flexus</i>                       | Capable of synthesis of anisotropic silver nanoparticles                                                                                                                                                                                                                                                  | [118]     |
| <i>Bacillus megaterium</i>                   | Capable of biosynthesis of silver nanoparticles and have antibacterial activity on multi drug resistant clinical pathogens                                                                                                                                                                                | [119]     |
| <i>Brevibacterium frigiditolerans</i>        | Capable of producing silver nanoparticles                                                                                                                                                                                                                                                                 | [120]     |
| <i>Corynebacterium callunae</i>              | Have the function for activity and stability of the enzyme Orthophosphate                                                                                                                                                                                                                                 | [121]     |
| <i>Microbacterium radiodurans</i>            | UV radiation-tolerant bacterium useful in cancer research, with heavy metal bioremediation capabilities                                                                                                                                                                                                   | [122]     |
| <i>Micrococcus yunnanensis</i>               | Anti-oxidative, anti-tumour-promoting, and anti-carcinogenic activities of adonirubin and adonixanthin                                                                                                                                                                                                    | [123]     |
| <i>Meyerozyma guilliermondii</i>             | Antifungal activity                                                                                                                                                                                                                                                                                       | [124]     |
| <i>Penicillium corylophilum</i>              | Antibacterial activity                                                                                                                                                                                                                                                                                    | [125]     |
| <i>Penicillium spp.</i>                      | Capable of biosynthesis of silver nanoparticles                                                                                                                                                                                                                                                           | [126]     |
| <b>Promoting and Protecting Plant Growth</b> |                                                                                                                                                                                                                                                                                                           |           |
| <i>Bacillus aryabhatai</i>                   | Zinc-solubilising abilities                                                                                                                                                                                                                                                                               | [127]     |
| <i>Brevibacterium casei</i>                  | Capable of promoting plant growth                                                                                                                                                                                                                                                                         | [128]     |
| <i>Microbacterium imperial</i>               | Capable of biodegradation of bromoxynil—to reduce its acute toxicity                                                                                                                                                                                                                                      | [129]     |
| <i>Paenibacillus polymyxa</i>                | Capable of nitrogen fixation, plant growth promoting, soil phosphorus solubilisation and production of exopolysaccharides, hydrolytic enzymes, antibiotics and cytokinin. Helps biofloculation and the enhancement of soil porosity as well as capable of producing optically active 2,3-butanediol (BDL) | [130]     |
| <i>Pantoea agglomerans</i>                   | Capable of controlling post-harvest diseases on apples                                                                                                                                                                                                                                                    | [131]     |
| <i>Pseudomonas fluorescens</i>               | Plant protection                                                                                                                                                                                                                                                                                          | [132]     |
| <i>Serratia marcescens</i>                   | Capable of biocontrol against avocado pathogens                                                                                                                                                                                                                                                           | [133]     |
| <i>Aureobasidium pullulans</i>               | Biotechnologically important yeast                                                                                                                                                                                                                                                                        | [134]     |
| <i>Penicillium citrinum</i>                  | Capable of producing plant growth by promoting metabolites                                                                                                                                                                                                                                                | [135]     |
| <i>Trichoderma longibrachiatum</i>           | Help optimising culture conditions for agricultural purposes                                                                                                                                                                                                                                              | [73]      |
| <b>Environmental Contribution</b>            |                                                                                                                                                                                                                                                                                                           |           |
| <i>Micrococcus luteus</i>                    | Capable of bioremediation of polychlorinated biphenyl (PCB) contaminated environments                                                                                                                                                                                                                     | [136]     |
| <i>Pseudomonas putida</i>                    | Capable of Xenobiotic degrading                                                                                                                                                                                                                                                                           | [137]     |
| <i>Pseudomonas stutzeri</i>                  | Capable of denitrification, degradation of aromatic compounds and nitrogen fixation                                                                                                                                                                                                                       | [138]     |
| <i>Aureobasidium melanogenum</i>             | Promising biomaterial and can be used for packing food and drugs                                                                                                                                                                                                                                          | [139]     |
| <i>Rhizopus oryzae</i>                       | Capable of biodiesel production                                                                                                                                                                                                                                                                           | [140]     |
| <i>Trichoderma viride</i>                    | Capable of enhancement of fungal delignification                                                                                                                                                                                                                                                          | [75]      |

<https://doi.org/10.1371/journal.pone.0242969.t003>

few years is cancer research [143]. By loading anti-cancer drugs into nanoparticles, more favourable pharmacokinetics and adjustable biodistribution of nanoparticles can increase the efficacy of the drug [144]. It is noteworthy that the current study detected four microorganisms that have the capability of producing silver nanoparticles. Silver nanoparticles are an arch product from the field of nanotechnology and have gained boundless interest because of their unique properties such as chemical stability, good conductivity, catalytic properties and, most importantly, antibacterial, anti-viral and antifungal activities [145].

In order to make the environment healthier for human beings, contaminated water bodies and land need to be rehabilitated to make them free from toxic waste, heavy metals and trace elements. With the escalated growth of various industries, there has been a considerable increase in the discharge of industrial waste into the air, soil and water, and this has led to the accumulation of heavy metals and toxic waste in these environments, especially in urban areas.

The use of microorganisms (*Micrococcus luteus* for example) for remediation technologies and bioremediation to rehabilitate and re-establish the natural condition of the environment is an emerging science [146, 147]. Other ways of environmental rehabilitation using microorganisms, such as fungal delignification (*Trichoderma viride*) [148] and biodiesel production (*Rhizopus oryzae*) [149] have also been investigated during the last few years.

The 26 different useful species that were identified in the selected facility could all be extremely beneficial in various fields of technology; however, not one of these microorganisms was likely to have a direct impact on the product or the food handlers in the facility. Therefore, because there are still no standards or an implementation plan available [150], it is important to create awareness of what needs to be monitored in each industrial environment. Although innocuous and useful bioaerosols do not negatively influence human health, it is critical to mention that the presence of innocuous and useful bioaerosols still serves as an indicator that an ideal environment exists for possible harmful bioaerosols to emerge. In addition, any type of bioaerosol that occurs in excess will have a negative influence on the food product and this should also be considered [20, 109, 150–153].

**Potentially harmful bioaerosols.** Various bioaerosols can have infectious, allergenic or toxic effects on living organisms and may impact human and animal health and agricultural outcomes on a local, regional or global scale. Many plant, animal and human pathogens are dispersed through the air [3, 154], and thus the occupational health of workers is easily affected. Various major infectious diseases in humans such as foot-and-mouth disease, tuberculosis, Legionnaire's disease, influenza and measles can be spread by airborne bacteria or viruses [4, 77]. Moreover, the inhalation of pathogenic, viable airborne fungi such as *Aspergillus*, *Cryptococcus* and *Pneumocystis* spp. can cause invasive lung infections associated with mortality rates of up to 95% in infected populations [77, 155–157].

Food safety is a complex issue that has an impact on multiple segments of society. Usually a food is considered too adulterated if it contains a poisonous or otherwise harmful substance that is not an inherent natural constituent of the food itself; if it poses a reasonable possibility of injury to health or is presented in a substance that is an inherent natural constituent of the food itself; if it is not the result of environmental, agricultural, industrial, or other contamination; and if is present in a quantity that ordinarily renders the food injurious to health [65].

Harmful microorganisms can: (i) be pathogenic/infectious; (ii) multidrug resistant; (iii) cause food poisoning; (iv) cause food spoilage; (v) cause negative occupational health effects. It was likely that allergenic and/or toxic agents forming bioaerosols and causing occupational diseases of the respiratory tract and skin would be present due to the layout (no airflow, production lines in close proximity to one another) and the type of product the facility produced [56]. Table 4 depicts the four types of harmful bioaerosols that were detected during the two sampling seasons.

*Staphylococcus* spp. are indicators of the severity of air pollution and their presence may indicate the further presence of pathogenic bacteria [184–186]. In the current study, five *Staphylococcus* spp. (*cohnii*, *epidermidis*, *haemolyticus*, *hominis* subsp *novobiosepticus* and *succinus*) were detected on more than ten occasions in different areas in peak and off-peak air samples (Fig 4). *Staphylococcus cohnii*, *epidermidis*, *haemolyticus*, *hominis* subsp *novobiosepticus* and *succinus* are coagulase-negative staphylococci that may be responsible for bloodstream infections in immuno-suppressed patients [145, 168, 171, 172, 174]. Even though these species can only affect immuno-suppressed individuals, their multidrug resistance capacity against available antimicrobial agents is considered a problem and is the reason why these species are of clinical significance [187].

Although *Staphylococcus* spp. are opportunistic pathogens and rarely cause human infections, their ability to form biofilms on different equipment surfaces had the potential to

**Table 4. Harmful bioaerosols detected and classified alphabetically according to their pathogenicity and infection potential, multidrug resistance, food poisoning and food spoilage potential.**

| Genus and Specie                               | Reference | Genus and Specie                                                      | Reference | Genus and Specie                                                      | Reference |
|------------------------------------------------|-----------|-----------------------------------------------------------------------|-----------|-----------------------------------------------------------------------|-----------|
| <b>Pathogenicity/Infection Potential</b>       |           |                                                                       |           |                                                                       |           |
| <i>Acinetobacter woffii</i> (MW148768)         | [158]     | <i>Pantoea agglomerans</i> (MW148775)                                 | [57]      | <i>Staphylococcus kloosii</i> (MW148786)                              | [159]     |
| <i>Acinetobacter schindleri</i> (MW148769)     | [160]     | <i>Pseudomonas oryzihabitans</i> (MW148778)                           | [161]     | <i>Staphylococcus pasteurii</i> (MW148787)                            | [162]     |
| <i>Aerococcus urinaeequi</i> (MW148770)        | [53]      | <i>Pseudomonas stutzeri</i> (MW148779)                                | [138]     | <i>Staphylococcus petrasii</i> (MW148788)                             | [163]     |
| <i>Aerococcus viridans</i> (MW148771)          | [164]     | <i>Serratia marcescens</i> (MW148780)                                 | [165]     | <i>Staphylococcus saprophyticus</i> (MW148789)                        | [166]     |
| <i>Bacillus licheniformis</i> (MW148772)       | [167]     | <i>Staphylococcus cohnii</i> (MW148782)                               | [168]     | <i>Staphylococcus simulans</i> (MW148790)                             | [169]     |
| <i>Brevibacterium casei</i> (MW148773)         | [170]     | <i>Staphylococcus epidermidis</i> (MW148783)                          | [171]     | <i>Staphylococcus succinus</i> (MW148791)                             | [172]     |
| <i>Enterobacter hormaechei</i> (MW148794)      | [173]     | <i>Staphylococcus haemolyticus</i> (MW148784)                         | [174]     | <i>Staphylococcus succinus subsp. casei</i> (MW148792)                | [172]     |
| <i>Paenibacillus glucanolyticus</i> (MW148774) | [175]     | <i>Staphylococcus hominis</i> subsp <i>novobiosepticus</i> (MW148785) | [145]     | <i>Staphylococcus warneri</i> (MW148793)                              | [176]     |
| <i>Alternaria</i> spp. (MW148486)              | [64]      | <i>Cryptococcus albidus</i> (MW165043)                                | [72]      | <i>Rhodotorula mucilaginosa</i> (MW165046)                            | [76]      |
| <i>Aureobasidium pullulans</i> (MW165040)      | [62]      | <i>Cryptococcus uzbekistanensis</i> (MW165044)                        | [177]     | <i>Wickerhamomyces anomalus</i> (MW165047)                            | [68]      |
| <i>Candida intermedia</i> (MW165041)           | [178]     | <i>Rhizopus oryzae</i> (MW148489)                                     | [69, 179] |                                                                       |           |
| <i>Candida parapsilosis</i> (MW165042)         | [66]      |                                                                       |           |                                                                       |           |
| <b>Multidrug Resistance</b>                    |           |                                                                       |           |                                                                       |           |
| <i>Staphylococcus arlettae</i> (MW148781)      | [180]     | <i>Staphylococcus epidermidis</i> (MW148783)                          | [171]     | <i>Staphylococcus hominis</i> subsp <i>novobiosepticus</i> (MW148785) | [145]     |
| <i>Staphylococcus cohnii</i> (MW148782)        | [168]     | <i>Staphylococcus haemolyticus</i> (MW148784)                         | [174]     | <i>Staphylococcus succinus</i> (MW148791)                             | [172]     |
| <b>Food Poisoning</b>                          |           |                                                                       |           |                                                                       |           |
| <i>Bacillus licheniformis</i> (MW148772)       | [167]     |                                                                       |           |                                                                       |           |
| <i>Penicillium commune</i> (MW148487)          | [168]     | <i>Penicillium crustosum</i> (MW148488)                               | [181]     |                                                                       |           |
| <b>Food Spoilage</b>                           |           |                                                                       |           |                                                                       |           |
| <i>Pseudomonas fluorescens</i> (MW148776)      | [182]     | <i>Pseudomonas fragi</i> (MW148777)                                   | [183]     |                                                                       |           |
| <i>Meyerozyma guilliermondii</i> (MW165045)    | [67]      | <i>Penicillium commune</i> (MW148487)                                 | [168]     | <i>Penicillium crustosum</i> (MW148488)                               | [181]     |

Genbank accession number for each isolate indicated in brackets.

<https://doi.org/10.1371/journal.pone.0242969.t004>

negatively influence the hygiene of workers in this specific production facility. Despite the low pH as well as the water activity and high sugar content that are characteristics of fruit juice, various *Staphylococcus* spp. have been detected in fruit juice [187–189]. Therefore, according to the standard operating procedures of this specific industry, *Staphylococcus* spp. should not be present in the production environment. Even with regards to infectious diseases only, no clear correlation was found between concentrations of culturable microorganisms in the air and infection. One reason for this could be that infection should be correlated with the dose rather than the concentration. Unfortunately, dose-response relationships still have not been established for most biological agents [47].

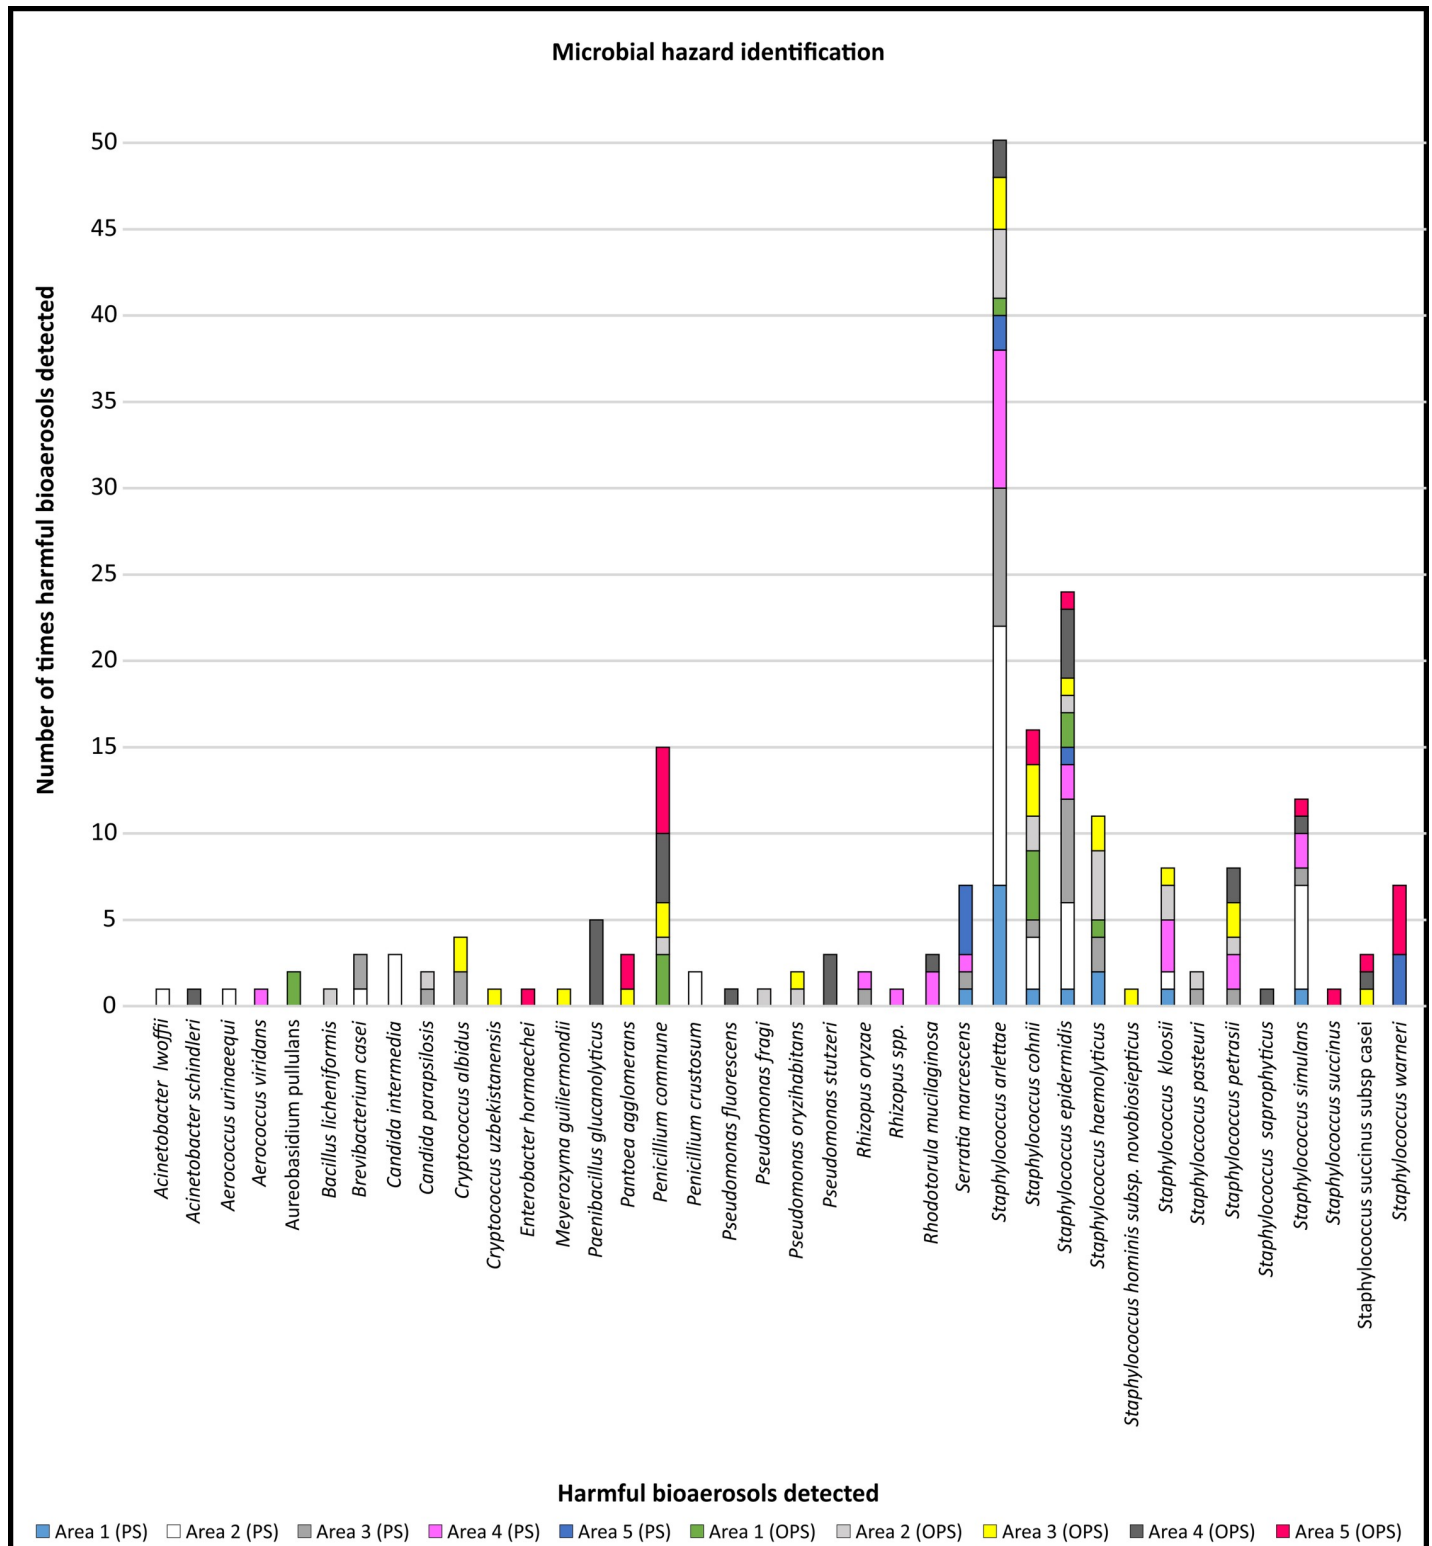

**Fig 4. Microbial hazard identification.** Number of identified harmful bioaerosols detected during the two sampling seasons in the designated areas: entrance to the production area (Area 1), preparation and mixing of materials (Area 2), between the production lines (Area 3), dispersion of bottles (Area 4) and filling of the final product (Area 5). The two sampling phases are indicated as peak season (PS) (onset of summer) and off-peak season (OPS) (onset of autumn).

<https://doi.org/10.1371/journal.pone.0242969.g004>

*Bacillus licheniformis* is known as one of the most prevalent spore-forming bacterial species which present a worldwide problem to food industries such as fruit juice and dairy manufacturing facilities because of their relevance to food spoilage and quality issues. These thermophilic spore-forming bacteria are able to grow during the manufacturing of powder type of products in different sections of manufacturing and will continue to grow throughout processing [190].

Yeast and mould have been used for centuries in the production of diverse foods and beverages. They have also been shown to be involved in the spoilage of an extensive range of foods. Yeasts, predominantly *Saccharomyces* and *Zygosaccharomyces* spp., are able to grow at low pH values in foods with a high sugar content and at refrigeration temperature, making them potential spoilers of refrigerated or concentrated fruit juices [31, 85, 191]. However, none of these yeasts were isolated during the two sampling seasons. This may indicate that they were possibly present but were not isolated; were not present in the environmental air of the facility; or were not present in the environment of this facility at all.

Fungal spoilage encompasses the decay of foods, including the development of off-flavours, acidification, discolouration, and disintegration. Moulds that are typically isolated from fruit juice belong mainly to the *Penicillium* genus and have been identified in several earlier studies [77, 192]. In the current study, *Penicillium commune* was detected on more than ten occasions in peak and off-peak samples collected in different areas (Fig 4). Fungal spoilage can endanger the health of humans by exposing consumers to toxic secondary metabolites such as mycotoxins [5]. The mycotoxin (Cyclopiazonic acid) producing ability displayed by this isolate is a noteworthy fact as it causes poisoning in humans. It is widely known that there is an active metabolism and dissemination of hyaline fungal hyphae inside substrates before the formation of visible colonies on the surface of food. During this period of visible fungus colony formation, there is a potential risk of consumer exposure to mycotoxins [193].

Microorganisms with pathogenicity/infectious capacity, multidrug resistance and food poisoning/spoilage abilities can be found in the air and they also form part of certain environments as bioaerosols. Although the importance of bioaerosols and their impact on human health have been recognised, it is still difficult to accurately describe their role in the initiation or worsening of diverse symptoms and diseases. Diseases and food spoilage arise from exposure to biological agents through the transmission of infectious agents by direct and/or indirect contact, airborne transmission, and vector-borne transmission [194].

The transmission of pathogens and other bioaerosols among humans has been a topic of research for centuries as humans harbour diverse microbes (including pathogens) in and on their bodies. The presence and activities of humans, particularly in indoor environments, can influence bioaerosol concentrations negatively. This is depicted in Fig 4 where, in Area 5 (filling of final product), more personnel were involved and thus higher and more diverse harmful bioaerosols were observed. The emission of particles by breathing, sneezing, coughing, talking and movement, as well as from resuspension of dust due to human activity, has been the focus of numerous indoor bioaerosol studies [5, 151, 195–205]. In high-risk areas, for instance after the last heat treatment before filling and packaging, the food product (beverages) is susceptible to contamination [12].

Apart from the fact that *Candida* spp. and *Staphylococcus* spp. are responsible for a substantial number of infections independently, there is increasing evidence that they can co-exist in cases of biofilm associated infections. Interestingly, in Area 2 and Area 3 where *Candida* spp. were detected, *Staphylococcus* spp. were also observed (Fig 4). The clinical outcome of these mixed bacterial-fungal interactions is that the resultant infections can correlate with an increased frequency or severity of diseases [206]. Staphylococci constitute the main part of the human skin microbiome, and for this reason their role as pathogens has been underestimated [174].

Climatic conditions have a significant impact on the concentrations and diversity of air-borne microorganisms [5, 153, 155]. We considered temperature and airflow to determine if seasonal variation influenced the diversity, distribution and occurrence of harmful bioaerosols, as they were detected in various designated areas in the facility during both seasons (Fig 5). The average indoor air temperature ranged between 18–22°C ( $\pm 1.1^\circ\text{C}$ ) and airflow between 0 to 4.4. m.s<sup>-1</sup>. A clear trend was noted between Area 3 (between the production lines) and Area 4 (dispersion of bottles) with distinguished higher diversity and representability of the same species in both seasons. In Area 5 (filling of final product), where more personnel were involved, higher and more diverse harmful bioaerosols were detected, but the same species were not present during both seasons as the lowest diversity and representability of the same species were observed in Area 1 (entrance to the facility) during both seasons.

Ventilation is one of the most important means to control bioaerosols by supplying outdoor air and remove extra heat, humidity and contaminants from occupied spaces. Deficient ventilation as observed in Area 2 (preparation and mixing of materials) may contribute to massive bioaerosols load and the presence of harmful microorganisms such as *Bacillus licheniformis* and *Penicillium commune* [207].

During both seasons 39 different species were detected; *Staphylococcus* spp. [19] and *Pseudomonas* spp. [6], and to a lesser extent (with two species each) *Aerococcus* spp., *Acinetobacter* spp., *Penicillium* spp., *Candida* spp., *Cryptococcus* spp. and *Rhizopus* spp. were the most prevalently harmful bioaerosols that were identified. Two of these prominent species, namely *Aerococcus* spp. and *Rhizopus* spp., were only detected during the peak season whereas *Acinetobacter* spp., *Penicillium* spp., *Candida* spp. and *Cryptococcus* spp. were detected during both the peak and off-peak seasons.

The second most prominent genera, *Pseudomonas* spp., with a prevalence of the species detected during the off-peak season in Areas 2, 3 and 4, is the most frequently reported genus of the bacteria found after sanitation of food processing surfaces across all types of food production. *Pseudomonas* spp. occur ubiquitously as they are associated with a wide range of niches in food production environments such as fruit juice facilities with respect to nutrients, temperature, surface materials, and stress factors [208]. This genus has established itself on stainless steel coupons placed in the processing environments of fruit juice related industries. *Staphylococcus* spp. is one of the most common Gram-positive genera found in food production environments, and was also the most prominent genera detected during this study in both seasons and were prevalent consistently throughout the facility in all high-risk areas. The bio-film-producing ability of staphylococci may contribute to their persistence in food processing environments, which also occurs in clinical environments [12, 209]. Three *Staphylococcus* spp. (*Staphylococcus cohnii*, *haemolyticus* and *succinus*) were found in all five designated areas.

Bacteria have been reported as the dominant bioaerosol associated microorganisms and they seem to have dominated in most production environments. However, research has shown that in production environments that are more ideal for eukaryotic microorganisms (dry environments and low water activity), yeasts and moulds may be present in significant numbers [209–211]. Four specific eukaryotic microorganisms were detected in this study during both seasons, namely *Cryptococcus albicans*, *Rhodotorula mucilaginosa*, *Wickerhamomyces anomalus*, and *Penicillium commune*.

Even though it is generally accepted that seasonal variations have an influence on the concentration and diversity of microorganisms, any increase in temperature and air exchange rate will cause an increase in airborne bacteria, yeast and mould [5, 20, 152, 153]. We found that the temperature in the studied facility did not fluctuate significantly during the two seasons, and it is thus not unreasonable to assume that external seasonal variation in this case did not influence the microbial concentration or diversity in the different sampling areas. The only



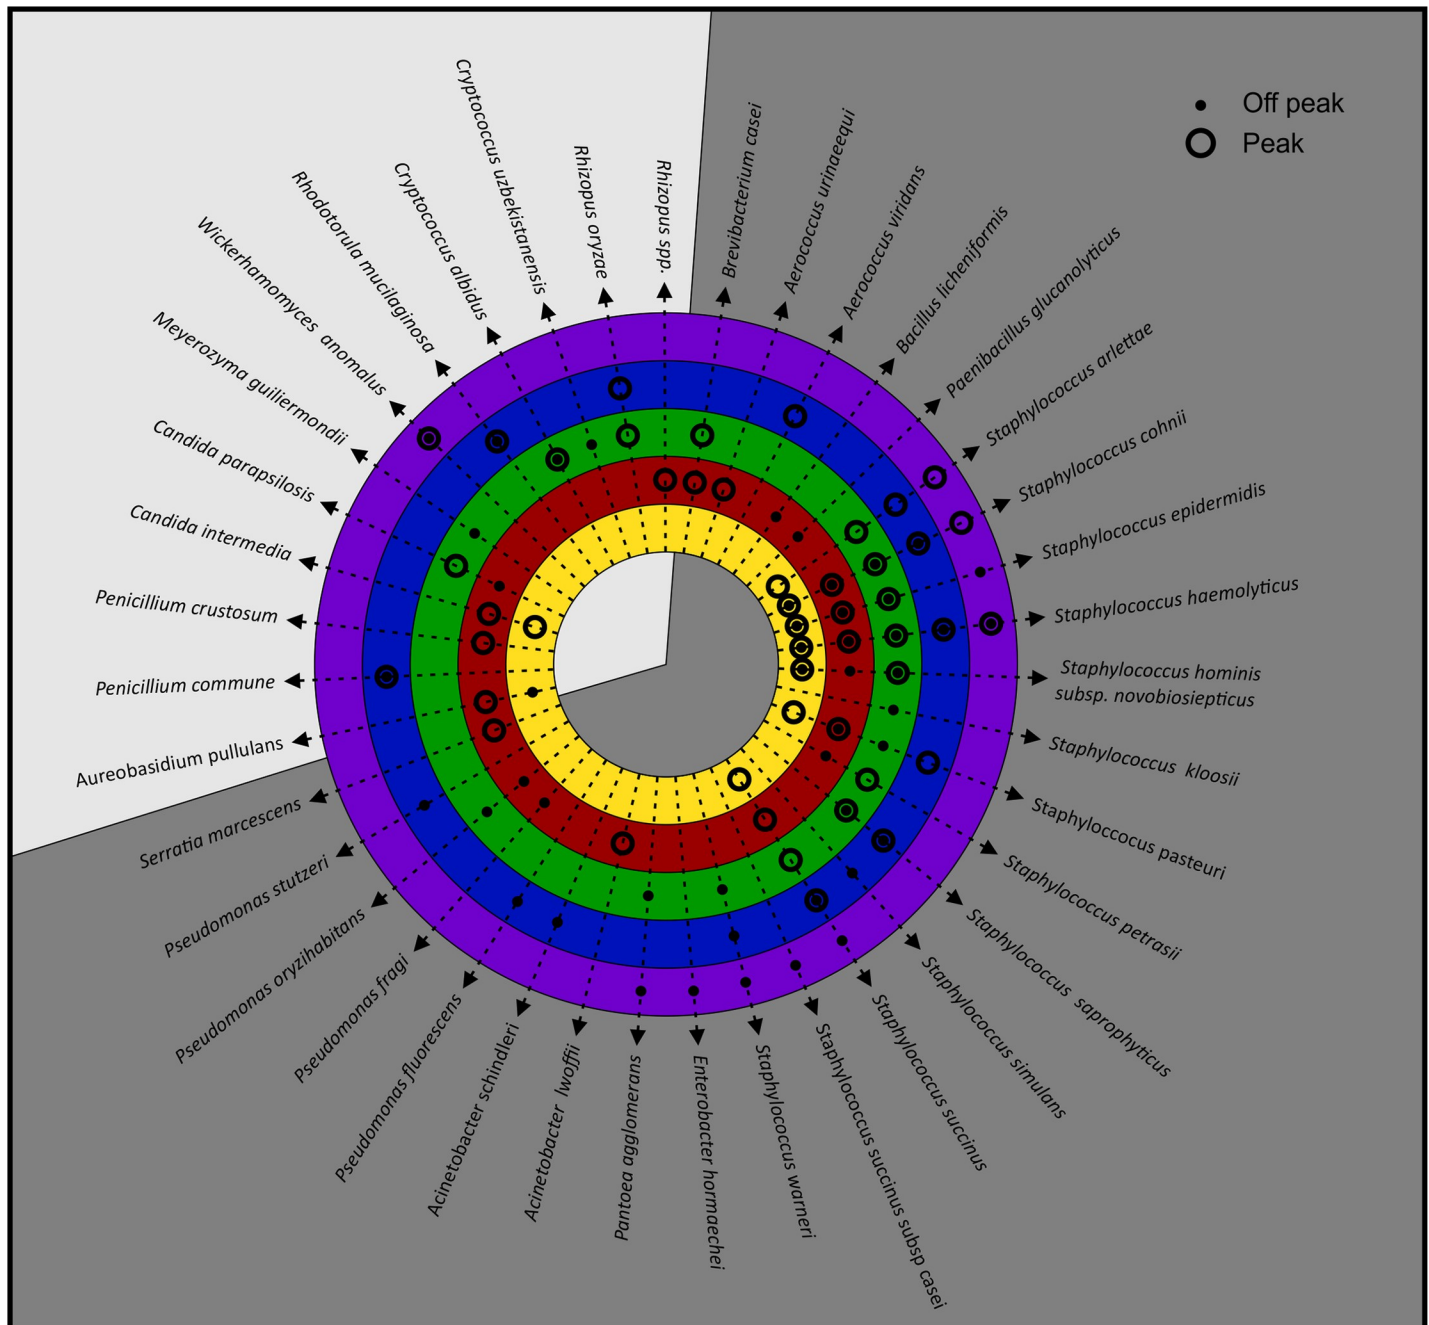

**Fig 5. Harmful bioaerosols detected in samples from the different designated areas: Entrance to the production area (Area 1: Yellow), preparation and mixing of materials (Area 2: Red), between the production lines (Area 3: Green), dispersion of bottles (Area 4: Blue) and filling of the final product (Area 5: Purple).** Sampling occurred during peak season (onset of summer) and off-peak season (onset of autumn) to establish if seasonal variation would impact the accumulation and spread of the harmful bioaerosols. Bacteria are represented by the dark grey region and the yeast and mould are represented by the light grey region.

<https://doi.org/10.1371/journal.pone.0242969.g005>

variation observed was more personnel present during the off-peak season in all the areas, which might explain the additional species observed during this season. Moreover, the airborne microbial levels increased significantly in the occupied areas compared to the unoccupied areas. This finding supports the argument that humans are mainly the source of bacteria and fungi in settled dust samples [151].

When comparing the densities of the harmful bioaerosols that were detected, only a small group of the species (Table 4) had the ability to influence the products manufactured at the facility. Kim *et al.* [5] argued that although food poisoning and/or spoilage microorganisms are present in the air, it is not a certainty that they will negatively affect the product or consumer. Other factors that affect their capability to cause spoilage or poisoning such as dose relationship, microbial competition and contact with the host should also be considered. With this in mind, it may explain the fact that even though these food poisoning and/or spoilage microorganisms were present in the air, no incidences of product spoilage were reported during routine monitoring at this facility. A significant number of pathogenic bioaerosols were detected, and these all had the potential to impact the occupational health of the personnel in the facility negatively. This confirms the argument that the measurement of bioaerosols should be performed according to a protocol that is representative of exposure patterns and duration that relates to the dose [5, 184]. Therefore, estimating the dose of culturable bacteria that affect people who inhale it in a factory seems to be important for future exposure analyses.

Despite tremendous scientific progress globally, the body of knowledge about biologically originated indoor air pollution seems to remain relatively narrow and insufficient [11]. The reasons for this limited scope could be attributed to: (i) a lack of modern sampling instrumentation (that is industry-bioaerosol specific); (ii) common use of old methods to evaluate the microbiological quality of air; (iii) relatively high costs of instrumental analyses for bacterial and fungal toxins and their markers; (iv) lack of common approved criteria for assessing exposure to biological factors; and (v) a very low number of institutions/organisations interested in (or obligated to perform) comprehensive environmental monitoring of bioaerosols [11].

It has been argued that, although the complexity and importance of the subject of indoor bioaerosol dynamics have been underscored by various studies, our understanding of this phenomenon is not yet mature. One might therefore anticipate fundamental paradigm shifts as knowledge grows and the ability to ask and answer incisive questions improves. Therefore, because the gap between what we know and what we would like to know is extensive, our current knowledge is insubstantial, and we need to realise that we will probably never be able to measure everything. Nevertheless, we need to accurately measure what can reasonably be expected within scientifically determined parameters.

In light of the above arguments, the diversity and complexity of fruit juice facilities will continue to pose great challenges for studies on indoor bioaerosol dynamics. This is because mere basic identification and simply analysing bioaerosol concentrations in the air can lead to misclassification errors of aerosol sources, and misidentification can also lead to misattribution. In this context, the findings of the current study may serve as a reference for future assessments and they may contribute to: (i) policy reviews for product and occupational health; (ii) research efforts in the field to be more outcomes specific; (iii) the implementation of preventative occupational health programs; (iv) the formulation of recommendations aimed at providing healthier production and working environments; and (v) the setting of a clear standard with scientifically established limits in order for facilities to operate within a safe range concerning bioaerosols, the safety of employees, and product quality and safety.

## Conclusion

Bacteria, yeast and mould are the main groups of microorganisms found in bioaerosols. The actual identity, diversity and abundance of different types of bioaerosol particles, as well as their temporal and spatial variability in the fruit juice industry, have not been well characterised. Overall, the role of bioaerosols in the atmosphere and their interaction with other ecosystems are not well described and understood.

The analyses that were conducted isolated 239 bacteria, 41 yeasts and 43 moulds from the air in the production environment of a fruit juice manufacturing facility. The culturable fraction of the bioaerosols identified were categorised into three main groups, namely 27 innocuous, 26 useful and 39 harmful bioaerosols. In the innocuous bioaerosol group, two genera were dominant, namely the *Bacillus* and *Staphylococcus*, and only four innocuous yeasts and moulds were detected. Although innocuous and useful bioaerosols do not negatively influence human health, it is critical to mention that the presence of innocuous and useful bioaerosols serves as an indicator that an ideal environment exists for possible harmful bioaerosols to emerge. In addition, any type of bioaerosol that is in excess could have a negative influence on the food product and should be dealt with.

This study demonstrated that all types of culturable airborne microorganisms occur ubiquitously and are naturally part of the air environment in fruit juice manufacturing facility. It is therefore important that food processing facilities ensure that measures are taken to reduce bioaerosols that may cause product contamination or even occupational health issues. However, there is clearly a need to be more industry- and outcome-specific before monitoring the prevalence of bioaerosols in a specific industry. Culture-dependent methods remain important if information regarding the viability and metabolic activity of these organisms is to be obtained. It is also important that the role that different microbes play in distinctive processes is ascertained and that a clear bioaerosol standard with scientifically established limits be disseminated so that facilities may operate within a safe range.

## Author Contributions

**Conceptualization:** Shirleen M. Theisinger, Olga de Smidt.

**Data curation:** Shirleen M. Theisinger.

**Formal analysis:** Shirleen M. Theisinger, Olga de Smidt, Jan F. R. Lues.

**Funding acquisition:** Olga de Smidt.

**Investigation:** Shirleen M. Theisinger.

**Methodology:** Shirleen M. Theisinger.

**Project administration:** Olga de Smidt.

**Resources:** Olga de Smidt.

**Supervision:** Olga de Smidt, Jan F. R. Lues.

**Visualization:** Shirleen M. Theisinger, Olga de Smidt.

**Writing – original draft:** Shirleen M. Theisinger, Olga de Smidt.

**Writing – review & editing:** Jan F. R. Lues.

## References

1. Hirst JM (1995) Handbook of bioaerosols: introduction, retrospect and prospect. Boca Raton, Florida, United States: Lewis Publishers. pp. 1–10.
2. Shale K, Lues JFR (2007) The etiology of bioaerosols in food environments. Food Reviews International 23: 73–90.
3. Yao M (2018) Bioaerosol: A bridge and opportunity for many scientific research fields. Journal of Aerosol Science 115: 108–112.
4. Frohlich-Nowoisky J, Kamp CJ, Weber B, Huffman JA, Pohlker C, Andrea MO, et al. (2016) Bioaerosols in the Earth system: climate, health, and ecosystem interactions. Atmospheric Research 182: 346–76.

5. Kim K, Kabir E, Jahan S (2018) Airborne bioaerosols and their impact on human health. *Journal of Environmental sciences* 67: 23–35. <https://doi.org/10.1016/j.jes.2017.08.027> PMID: 29778157
6. Despres VR, Huffman JA, Burrows SM, Hoose C, Safatov AS, Buryak G, et al. (2012) Primary biological aerosol particles in the atmosphere: a review. *Tellus B: Chemical and Physical Meteorology* 64: 3059.
7. Humbal C, Gautam S, Trivedi U (2018) A review on recent progress in observations, and health effects of bioaerosols. *Environmental International* 118: 189–193.
8. Ferguson RMW, Garcia-Alcega S, Coulon F, Dumbrell AJ, Whitby C, Colbeck I (2019) Bioaerosol bio-monitoring: Sampling optimization for molecular microbial ecology. *Molecular Ecology Resources* 19: 672–690. <https://doi.org/10.1111/1755-0998.13002> PMID: 30735594
9. Yoo K, Lee TK, Choi EJ, Yang J, Shukla SK, Hwang S, et al. (2017) Molecular approaches for detection and monitoring of microbial communities in bioaerosols: a review. *Journal of Environmental Science* 51: 234–47.
10. Bulski K, Ostafin M, Fraczek K, Chemiel MJ, Suprovych T, Pustova Z (2017) The microbiological air quality at the fruit and vegetable processing facility. *Agronomy and Veterinary Medicine* 1(1): 54–64.
11. Cox J, Mbareche H, Lindsley WG, Duchaine C (2020) Field sampling of indoor bioaerosols. *Aerosol Science Technology* 54(5): 572–584. <https://doi.org/10.1080/02786826.2019.1688759> PMID: 31777412
12. Masotti F, Cattaneo S, Stuknyte M, De Noni I (2019) Airborne contamination in the food industry: An update on monitoring and disinfection techniques of air. *Trends in Food Science & Technology* 90: 147–156.
13. Afanou KA, Straumfors A, Skogstad A, Nayak AP, Skaar I, Hjeljord L, et al. (2015) Indirect immune detection of fungal fragments by field emission scanning electron microscopy. *Applied Environment Microbiology* 81(17): 5794–803.
14. Eduard W, Heederik D, Duchaine C, Green BJ (2012) Bioaerosol exposure assessment in the workplace: the past, present and recent advances. *Journal of Environmental Monitoring* 14(2): 334–39. <https://doi.org/10.1039/c2em10717a> PMID: 22267210
15. Rittenour WR, Hamilton RG, Beezhold DH, Green BJ (2012) Immunologic, spectrophotometric and nucleic acid-based methods for the detection and quantification of airborne pollen. *Journal of Immunologic Methods* 383(1–2): 47–53. <https://doi.org/10.1016/j.jim.2012.01.012> PMID: 22342607
16. Heather JM, Chain B (2016) The sequence of sequencers: the history of sequencing DNA. *Genomics* 107: 1–8. <https://doi.org/10.1016/j.ygeno.2015.11.003> PMID: 26554401
17. Yassin MF, Almouqatea S (2010) Assessment of airborne bacteria and fungi in an indoor and outdoor environment. *International Journal of Environmental Science Technology* 7(3): 535–44.
18. Etiakn I, Musa SA, Alkassim RS (2016) Comparison of convenience sampling and purposive sampling. *American Journal of Theoretical and Applied Statistics* 5(1): 1–4.
19. Aliakbar R, Kazem N, Allahbakhsh J (2013) Measurements of bioaerosols in the air around the facilities of waste collection and disposal. *Environmental Protect Engineering* 39: 105–12.
20. Frankel M, Beko G, Timm M, Gustavsen S, Hansen EW, Madsen A (2012) Seasonal variation of indoor microbial exposures and their relations to temperature, relative humidity and air exchange rates. *Applied Environmental Microbiology* 78(23): 8289–97. <https://doi.org/10.1128/AEM.02069-12> PMID: 23001651
21. National advisory committee on microbiological criteria for foods (2018) Response to questions posed by the Department of Defence regarding microbiological criteria as indicators of process control or insanitary conditions. *Journal of Food Protection* 81(1): 115–41. <https://doi.org/10.4315/0362-028X.JFP-17-294> PMID: 29280677
22. 3<sup>rd</sup> edition. Washington, DC: American Public Health Association; 1992. Chapter 4, Compendium of methods for the microbiological examination of foods; p. 75–95.
23. Anderson PW (1958) Absence of diffusion in certain random lattices. *Physical Review* 109: 1492.
24. Lee BU, Lee G, Heo KJ (2016) Concentration of culturable bioaerosols during winter. *Journal of Aerosol Science* 94: 1–8.
25. Barata A, Malfeito-Ferreira M, Loureiro V (2012) The microbial ecology of wine grape berries. *International Journal of Food Microbiology* 153: 243–59. <https://doi.org/10.1016/j.ijfoodmicro.2011.11.025> PMID: 22189021
26. Montero A, Dueker ME, Mullan GDO (2016) Culturable bioaerosols along an urban waterfront are primarily associated with coarse particles. *Peer Journal* 4: 18–36. <https://doi.org/10.7717/peerj.2827> PMID: 28028485

27. Marchesi JR, Sato T, Weightman AJ, Martin TA, Fry JC, Hiom SJ, Wade WG (1998) Design and evaluation of useful bacterium-specific PCR primers that amplify genes coding for bacterial 16S rRNA. *Applied and Environmental Microbiology* 64(2): 795–99. <https://doi.org/10.1128/AEM.64.2.795-799.1998> PMID: 9464425
28. Kurtzman CP, Robnett CJ (1998) Identification and phylogeny of yeasts from analysis of nuclear large subunit (26S) ribosomal DNA partial sequence. *Antonie van Leeuwenhoek* 73: 331–71. <https://doi.org/10.1023/a:1001761008817> PMID: 9850420
29. Yang Q, Angly FE, Wang Z, Zhang H (2011) Wastewater treatment systems harbour specific and diverse yeast communities. *Biochemical Engineering Journal* 58: 168–76.
30. Davolos D, Pieterangeli B (2007) DNA sequencing and phylogenetic analysis of allergen-encoding genes from airborne moulds and yeast. *Prev Oggi* 3: 23–35.
31. Rojo MC, Palazzolo CT, Cuello R, Gonzalez M, Guevara F, Ponsone ML, et al. (2017) Incidence of osmophilic yeasts and *Zygosaccharomyces rouxii* during the production of concentrate grape juices. *Food Microbiology* 64: 7–14. <https://doi.org/10.1016/j.fm.2016.11.017> PMID: 28213037
32. White TJ, Bruns T, Lee S, Taylor JW (1990) Amplification and direct sequencing of fungal ribosomal RNA genes for phylogenetic PCR protocols: a guide to methods and applications. pp. 315–22.
33. Altschul SF (1997) Evaluating the statistical significance of multiple distinct local alignments. *Theoretical and computational methods in genome research*. pp. 1–14. New York: Plenum Press.
34. Daugelaitė J, O'Driscoll A, Sleator RD (2013) Overview of multiple sequence alignments and cloud computing in bioinformatics. *ISRN Biomathematics*. pp. 16–30.
35. Wei K, Zheng Y, Li J, Shen F, Zou Z, Fan H, et al. (2015) Microbial aerosol characteristics in highly polluted and near-pristine environments featuring different climatic conditions. *Scientific Bulletin* 60(16): 1439–47.
36. Walser SM, Brenner B, Heinze S, Szewzyk R, Wolter E, Herr CEW (2017) Environmental health relevance of airborne microorganisms in ambient and indoor air. *Bundesgesundheitsblatt* 60(6): 618–24. <https://doi.org/10.1007/s00103-017-2553-6> PMID: 28447136
37. Brandl H, Fricker-Feer C, Ziegler D, Mandal J, Stephan R, Lehner A (2014) Distribution and identification of culturable airborne microorganisms in a Swiss milk processing facility. *Journal of Dairy Science* 97: 240–246. <https://doi.org/10.3168/jds.2013-7028> PMID: 24210492
38. Heo KJ, Lim CE, Kim HB, Lee BU (2017) Effects of human activities on concentrations of culturable bioaerosols in indoor air environments. *Journal of Aerosol Science* 104: 58–65. <https://doi.org/10.1016/j.jaerosci.2016.11.008> PMID: 32226114
39. Wijnand E, Dick H, Duchaine C, Green BJ (2012) Bioaerosol exposure assessment in the workplace: the past, present and recent advances. *Journal of Environmental Monitoring* 14: 334–39. <https://doi.org/10.1039/c2em10717a> PMID: 22267210
40. Downes FP, Ito K (2001) *Compendium of methods for the microbiological examination of foods*. 4<sup>th</sup> edition. Washington, DC: American Public Health Association Press.
41. Food code (2017) US Public Health Service, Food and Drug Administration.
42. Kang Y, Frank JF (1988) Biological aerosols: a review of airborne contamination and its measurement in dairy processing plants. *Journal of Food Protection* 52(7): 512–24.
43. Lutgring KR, Linton RH, Zimmerman NJ, Peugh M, Heber AJ (1996) Distribution and quantification of bioaerosols in poultry-slaughtering plants. *J of Food Protection* 60(7): 804–10.
44. Venter P, Lues JFR, Theron H (2004) Quantification of bioaerosols in automated chicken egg production plants. *Poultry Sciences* 83: 1226–31. <https://doi.org/10.1093/ps/83.7.1226> PMID: 15285517
45. Saranraj P, Geetha M (2011) Microbial spoilage of bakery products and its control by preservatives. *International Journal of Pharmaceutical & Biological Archives* 3(1): 38–48.
46. Xia X, Wang J, Ji J, Zhang J, Chen L, Zhang R (2015) Bacterial communities in marine aerosols revealed by 454 pyrosequencing of the 16S rRNA gene. *American Meteorological Society* 72: 2997–3008.
47. Bragoszewska E, Mainka A, Pastuszka JS (2016) Bacterial aerosols in an urban nursery school in Gliwice, Poland: a case study. *Aerobiology*. pp. 156–78.
48. Bowers RM, Sullivan AP, Costello EK, Collett JL, Knight R, Fierer N (2011) Source of bacteria in outdoor air across cities in the Midwestern United States. *Applied Environmental Microbiology* 10: 498–511. <https://doi.org/10.1128/AEM.05498-11> PMID: 21803902
49. Kookan JM, Fox KF, Fox A (2012) Characterization of *Micrococcus* strains isolated from indoor air. *Molecular Cell Probes* 26(1): 1–5. <https://doi.org/10.1016/j.mcp.2011.09.003> PMID: 21963944
50. Zemouri C, De Soet H, Crielaard W, Laheij A (2017) A scoping review on bio-aerosols in healthcare and the dental environment. *PLOS ONE*. pp. 50–75.

51. Kamper P, Albrecht A, Buczolits S, Busse HJ (2002) *Psychrobacter faecalis* sp. nov., a new species from a bioaerosol originating from pigeon faeces. *System of Applied Microbiology* 25: 31–36.
52. Mekadim C, Killer J, Pechar R, Mrazek J (2019) Fragment of the aspartyl-tRNA synthetase applicable as a shared classification and phylogenetic marker in particular representatives of the order *Lactobacillales*. *Folia Microbiologica* 64(1): 113–20. <https://doi.org/10.1007/s12223-018-0638-8> PMID: 30094534
53. Rassmussen M (2016) *Aerococcus*: an increasingly acknowledged human pathogen. *Clinical Microbiology Infection* 22: 22–27. <https://doi.org/10.1016/j.cmi.2015.09.026> PMID: 26454061
54. Hara K, Zhang D, Matsusaki H, Sadanaga Y, Ikeda K, Hanaoka S, et al. (2015) UV-tolerant culturable bacteria in an Asian dust plume transported over the East China Sea. *Aerosol and Air Quality Research* 15: 591–99.
55. Madsen AM, Moslehi-Jenabian S, Islam MZ, Frankel M, Spilak M, Frederiksen MW (2018) Concentrations of *Staphylococcus* species in indoor air as associated with other bacteria, season, relative humidity, air change rate, and *S. aureus* positive occupants. *Environmental Research* 160: 282–91. <https://doi.org/10.1016/j.envres.2017.10.001> PMID: 29035784
56. Wang C-H, Chen BT, Han B-C, Liu AC-Y, Hung P-C, Chen C-Y, et al. (2015) Field evaluation of personal sampling methods for multiple bioaerosols. *PLOS ONE* 10(3): 308–27. <https://doi.org/10.1371/journal.pone.0120308> PMID: 25799419
57. Dutkiewicz J, Mackiewicz B, Lemieszek MK, Golec M, Milanowski J (2016) *Pantoea agglomerans*: a mysterious bacterium of evil and good. Part III. Deleterious effects: infections of humans, animals and plants. *Annals of Agricultural and Environmental Medicine* 23(2): 197–205. <https://doi.org/10.5604/12321966.1203878> PMID: 27294620
58. Spang A, Saw JH, Jorgensen SL, Zaremba-Niedzwiedzka K, Martijn J, Lind AE, et al. (2015) Complex archaea that bridge the gap between prokaryotes and eukaryotes. *Nature* 521: 173–79. <https://doi.org/10.1038/nature14447> PMID: 25945739
59. Beuchat LR, Mann DA (2016) Comparison of new and traditional culture-dependent media for enumerating foodborne yeasts and moulds. *Journal of Food Protection* 79(1): 95–111. <https://doi.org/10.4315/0362-028X.JFP-15-357> PMID: 26735035
60. Douglas AK Jr, Hocking AD, Pitt JI (1979) Dichloran-Rose Bengal medium for enumeration and isolation of moulds from foods. *Applied Environmental Microbiology* 37(5): 959–64. <https://doi.org/10.1128/AEM.37.5.959-964.1979> PMID: 485140
61. Sajna KV, Sukumaran RK, Gottumukkala LD, Pandey A (2015) Crude oil biodegradation aided by bio-surfactants from *Pseudozyma* spp. NII 08165 or its culture broth. *Bioresource Technology* 191: 133–39. <https://doi.org/10.1016/j.biortech.2015.04.126> PMID: 25985416
62. Castoria R, De Curtis F, Lima G, Caputo L, Pacifico S, De Cicco V (2001) *Aureobasidium pullulans* (LS-30) an antagonist of postharvest pathogens of fruits: study on its modes of action. *Postharvest Biology and Technology* 22: 7–17.
63. Zhang Y, Crous PW, Schoch CL, Hyde KD (2012) Pleosporales. *Fungal Diversity* 53: 1–221. <https://doi.org/10.1007/s13225-011-0117-x> PMID: 23097638
64. Fernandez-Rodriguez S, Sadys M, Smith M, Tormo-Molina R, Skjoth CA, Maya-Manzano JM, et al. (2015) Potential sources of airborne *Alternaria* spp. spores in south-west Spain. *Science of the Total Environment* 533: 165–76.
65. Sowiak M, Brodka K, Kozajda A, Buczynska A, Szadkowska-Stanczyk I (2012) Fungal aerosol in the process of poultry breeding quantitative and qualitative analyses. *Medycyna Pracy* 63(1): 1–10. PMID: 22774459
66. Trofa D, Gacser A, Nosanchuk JD (2008) *Candida parapsilosis*, an emerging fungal pathogen. *Clinical Microbiology Reviews* 21: 606–625. <https://doi.org/10.1128/CMR.00013-08> PMID: 18854483
67. Wrent P, Rivas E-M, Gil de Prado E, Peinado JM, de Sillonix M-I (2015) Assessment of the factors contributing to the growth or spoilage of *Meyerozyma guilliermondii* in organic yoghurt: comparison of methods for strain differentiation. *Microorganisms* 3: 428–40. <https://doi.org/10.3390/microorganisms3030428> PMID: 27682098
68. Miceli MH, Diaz JA, Lee SA (2011) Emerging opportunistic yeast infections. *Lancet Infectious Disease* 11: 142–51. [https://doi.org/10.1016/S1473-3099\(10\)70218-8](https://doi.org/10.1016/S1473-3099(10)70218-8) PMID: 21272794
69. Spellberg B (2017) Mucormycosis pathogenesis: beyond *Rhizopus*. *Virulence* 8(8): 1481–82. <https://doi.org/10.1080/21505594.2017.1364335> PMID: 28806142
70. Kobza J, Pastuszka JS, Bragoszewska E (2018) Does exposure to aerosols pose a risk to dental professionals? *Occupational Medicine* 68: 454–58. <https://doi.org/10.1093/occmed/kqy095> PMID: 29931138

71. Limtong S, Nasanit R (2017) Phylloplane yeasts in tropical climates. *Yeasts in Natural Ecosystems: Diversity*. pp. 199–223.
72. Huang Y-H, Lin I-H, Chang T-C, Tseng S-H (2015) Early diagnosis and successful treatment of *Cryptococcus albidus* keratitis. *Medicine* 94(19): 94–98. <https://doi.org/10.1097/MD.0000000000000885> PMID: 25984681
73. Azin M, Moravej R, Zareh D (2007) Production of xylanase by *Trichoderma longibrachiatum* on a mixture of wheat bran and wheat straw: optimization of culture condition by Taguchi method. *Enzyme and Microbial Technology* 40: 801–805.
74. Du Plessis IL, Druzhinina IS, Atanasova L, Yarden O, Jacobs K (2018) The diversity of *Trichoderma* species from soil in South Africa, with five new additions. *Journal of Mycologia* 110(3): 559–83. <https://doi.org/10.1080/00275514.2018.1463059> PMID: 29902390
75. Ghorbani F, Karimi M, Biria D, Kariminia HR, Jaihanipour A (2015) Enhancement of fungal delignification of rice straw by *Trichoderma viride* sp. to improve its saccharification. *Biochemical Engineering Journal*. pp. 101: 77–84.
76. Dellgios M, Fraumene C, Abbondio M, Mannazzu I, Tanca A, et al. (2015) Draft genome sequence of *Rhodotorula mucilaginosa*: an emerging opportunistic pathogen. *Genome Announcements* 3(2): 201–15.
77. Lipsa FD, Ulea E, Chiriac IP (2016) Monitoring of fungal aerosols in some educational building from Lasi, Romania. *Environmental Engineering and Management Journal* 15(4): 801–07.
78. Bonadonna L, Briancesco R, Cocciam AM (2017) Analysis of microorganisms in hospital environments and potential risks. *Indoor Air Quality in Healthcare Facilities*. pp. 53–62.
79. Majchrzycka K, Okrasa M, Szulc J, Gutsrowska B (2017) Safety of workers exposed to harmful airborne bioaerosols: legal status and innovations. *Biotechnology Food Science* 81(2): 159–68.
80. Kuenzi M, The Working Party on Safety in Biotechnology of the European Federation of Biotechnology (1985) Safe biotechnology: general considerations. *Applied Microbiology Biotechnology* 21: 1–6.
81. Lelieveld HLM, Boon B, Bennett A, Brunius G, Cantley M, Chmiel A, et al. (1996) Safe biotechnology. 7. Classification of microorganisms on the basis of hazards. *Applied Microbiology Biotechnology* 45: 723–29. <https://doi.org/10.1007/s002530050754> PMID: 8987466
82. Hong SW, Park JM, Kim SJ, Chung KS (2012) *Bacillus eiseniae* sp. nov.: a swarming, moderately halotolerant bacterium isolated from the intestinal tract of an earthworm (*Eisenia fetida* L.). *International Journal of Systematic and Evolutionary Microbiology* 62: 2077–83. <https://doi.org/10.1099/ijs.0.034892-0> PMID: 22021583
83. Rooney AP, Price NPJ, Ehrhardt C, Swezey JL, Bannan JD (2009) *International Journal of Systematic and Evolutionary Microbiology* 59: 2429–36. <https://doi.org/10.1099/ijs.0.009126-0> PMID: 19622642
84. Gomez P, Casado C, Saenz Y, Ruiz-Ripa L, Estepa V, Zarazaga M, et al. (2017) Diversity of species and antimicrobial resistance determinants of staphylococci in superficial waters in Spain. *FEMS Microbiology Ecology* 93: 1–7. <https://doi.org/10.1093/femsec/fiw208> PMID: 27798063
85. Goyer N, Lavoie J, Lazure L, Marchand G (2001) *Bioaerosols in the workplace: evaluation, control and prevention guide*. Montreal: IRRST.
86. Kobayashi T, Iijima K, Redhakrisnan S, Vassallo VMR, Lawrence CB, Cyong JC, et al. (2009) Asthma-related environmental fungus, *Alternaria*, activates dendritic cells and produces potent Th2 adjuvant activity. *Journal of Immunology* 182(2): 2502–10.
87. Mandal J, Brandl H (2011) Bioaerosols in indoor environments: a review with special reference to residential and occupational locations. *The Open Environmental & Biological Monitoring Journal* 4: 83–96.
88. Sorensen WG, Jones W, Simpson J, Davidson JI (1984) Aflatoxin in respirable airborne peanut dust. *Journal of Toxicology and Environmental Health* 14: 525–33. <https://doi.org/10.1080/15287398409530603> PMID: 6439891
89. Wieser M, Schumann P, Martin K, Altenburger P, Burghardt J, Lubitz W, et al. (1999) *Agrococcus citreus* sp. nov., isolated from a medieval wall painting of the chapel of Castle Herberstein (Austria). *International Journal of Systematic Bacteriology* 49: 1165–70. <https://doi.org/10.1099/00207713-49-3-1165> PMID: 10425775
90. Alcocer AS, Ordaz NR, Ramirez CJ, Mayer JG (2007) Continuous biodegradation of single and mixed chlorophenols by a mixed microbial culture constituted by *Burkholderia* sp., *Microbacterium phyllopaerae* and *Candida tropicalis*. *Biochemical Engineering Journal* 37(2): 201–11.
91. Lee JS, Lee KC, Pyun YR, Bae KS (2003) *Arthrobacter koreensis* sp. nov.: a novel alkalitolerant bacterium from soil. *International Journal of Systematic and Evolutionary Microbiology* 53: 1277–80. <https://doi.org/10.1099/ijs.0.02492-0> PMID: 13130006

92. Zhang J, Wang J, Fang C, Song F, Xin Y, Qu L, et al. (2010) *Bacillus oceanisediminis* sp. nov., isolated from marine sediment. *International Journal of Systematic and Evolutionary Microbiology* 60: 2924–29. <https://doi.org/10.1099/ijs.0.019851-0> PMID: 20118297
93. Vaishampayan P, Probst A, Krishnamurthi S, Ghosh S, Osman S, Mcdowall A, et al. (2010) *Bacillus horneckiae* sp. nov., isolated for a spacecraft-assembly clean room. *International Journal of Systematic and Evolutionary Microbiology* 60: 1031–37. <https://doi.org/10.1099/ijs.0.008979-0> PMID: 19666815
94. Heyrman J, Rodriguez-Diaz M, Devos J, Felske A, Logan NA, De Vos P (2005) *Bacillus arenosi* sp. nov., *Bacillus arvi* sp. nov. and *Bacillus humi* sp. nov., isolated from soil. *International Journal of Systematic and Evolutionary Microbiology* 55: 111–17. <https://doi.org/10.1099/ijs.0.63240-0> PMID: 15653863
95. Seiler H, Schmidt V, Wenning M, Scherer S (2012) *Bacillus kochii* sp. nov., isolated from food and pharmaceuticals manufacturing site. *International Journal of Systematic and Evolutionary Microbiology* 62: 1092–97. <https://doi.org/10.1099/ijs.0.027771-0> PMID: 21705449
96. Lopez-Cortes A, Schumann P, Pukall R, Stackebrandt E (2006) *Exiguobacterium mexicanum* sp. nov. and *Exiguobacterium artemiae* sp. nov. isolated from the brine shrimp *Artemia franciscana*. *Systematic and Applied Microbiology* 29(3): 183–90. <https://doi.org/10.1016/j.syapm.2005.09.007> PMID: 16564954
97. Jemli S, Messaoud EB, Ayadi-Zouari D, Naili B, Khemakhem B, Bejar S (2007) B-cyclodextrin glycosyltransferase from a newly isolated *Paenibacillus pabuli* US132 strain: purification, properties and potential use in bread-making. *Biochemical Engineering Journal* 34: 44–50.
98. Tominaga T, An SY, Oyaizu H, Yokota A (2009) *Sporosarcina luteola* sp. nov. isolated from soy sauce production equipment in Japan. *Journal of Genetic Applied Microbiology* 55: 217–223. <https://doi.org/10.2323/jgam.55.217> PMID: 19590149
99. Yoon JH, Lee KC, Weiss N, Kang KH, Park YH (2003) *Jeotgalicoccus halotolerans* gen. nov., sp. nov. and *Jeotgalicoccus psychrophilus* sp. nov. isolated from the traditional Korean fermented seafood jeotgal. *International Journal of Systematic Bacteriology* 53: 595–602. <https://doi.org/10.1099/ijs.0.02132-0> PMID: 12710632
100. Place RB, Hiestand D, Gallmann HR, Teuber M (2003) *Staphylococcus equorum* subsp. lines, subsp. nov.: a starter culture component for surface ripened semi-hard cheeses. *System Applied Microbiology* 26: 30–37.
101. De Bel A, Svec P, Pteras P, Sedlacek I, Pantucek R, Echahidi F, et al. (2014) Reclassification of *Staphylococcus jettensis* De Bel et al. 2013 as *Staphylococcus petrasii* subsp. *jettensis* subsp. nov. and emended description of *Staphylococcus petrasii* Pantucek et al. 2013. *Journal of Systematic and Evolutionary Microbiology* 64: 4198–201. <https://doi.org/10.1099/ijs.0.064758-0> PMID: 25261165
102. Hajek V, Meugnier H, Bes M, Brun Y, Fiedler F, Chmela Z, et al. (1996) *Staphylococcus saprophyticus* subsp. *bovis* subsp. nov., isolated from bovine nostrils. *International Journal of Systematic Bacteriology* 46(3): 792–96. <https://doi.org/10.1099/00207713-46-3-792> PMID: 8782691
103. Chavda KD, Chen L, Fouts DE, Sutton G, Brinkac L, Jenkins SG, et al. (2016) Comprehensive genome analysis of carbapenemase-producing *Enterobacter* spp.: new insights into phylogeny, population structure, and resistance mechanisms. *American Society for Microbiology* 7(6): 2093–116. <https://doi.org/10.1128/mBio.02093-16> PMID: 27965456
104. Palmer M, de Maayer P, Poulsen M, Steenkamp ET, van Zyl E, Coutinho TA, et al. (2016) Draft genome sequences of *Pantoea vagans* isolates associated with termites. *Standard in Genomic Sciences* 11: 23–31. <https://doi.org/10.1186/s40793-016-0144-z> PMID: 26937267
105. Behrendt U, Ulrich A, Schumann P, Meyer JM, Sproer C (2007) *Pseudomonas lurida* sp. Nov., a fluorescent species associated with the phyllosphere of grasses. *International Journal of Systematic and Evolutionary Microbiology* 57: 979–85. <https://doi.org/10.1099/ijs.0.64793-0> PMID: 17473245
106. Gupta GN, Prakash V (2014) Isolation and Identification of a novel, cold active lipase producing Psychrophilic Bacterium *Pseudomonas vancouverensis*. *Trends in Biosciences* 7(22): 3708–11.
107. Kampfer P, Meurer U, Esser M, Hirsch T, Busse HJ (2007) *Spingomonas pseudosanguinis* sp. nov. isolated from the water reservoir of an air humidifier. *International Journal of Systematic and Evolutionary Microbiology* 57: 1342–45. <https://doi.org/10.1099/ijs.0.64942-0> PMID: 17551055
108. Nakase T, Komagat K, Fukaza Y (1976) *Candida pseudointermedia* sp. nov., isolated from 'Kamaboko', a traditional fish-paste product in Japan. *Journal of Genetic Applied Microbiology* 22: 177–82.
109. Viegas C, Monteiro A, Caroline E, Viegas S (2018) Occupational exposure to bioburden in Portuguese bakeries: an approach to sampling viable microbial load. *Arh Hig Rada Toksikol* 69: 250–57. <https://doi.org/10.2478/aiht-2018-69-3116> PMID: 30285943



110. Theisinger SM, de Smidt O (2017) Bioaerosols in the Food and Beverage Industry. In: Stauffer MT, editor. Ideas and applications toward sample preparation for food and beverage analysis. Croatia: Intech. pp. 51–75.
111. Figueiredo M, Bonifacio A, Rodrigues AC, De Araujo FF, Stamford NP (2016) Beneficial microorganisms: current challenge to increase crop performance. *Bioformulations: for Sustainable Agriculture*. pp. 41–54.
112. Egamberdieva D, Berg G, Lindstrom K, Rasanen LA (2013) Alleviation of salt stress of symbiotic *Galega officinalis* L. (goat's rue) by co-inoculation of *Rhizobium* with root-colonizing *Pseudomonas*. *Plant and Soil* 369: 453–65.
113. Nadeem SM, Ahmad M, Zahir ZA, Javaid A, Ashraf M (2014) The role of mycorrhizae and plant growth promoting rhizobacteria (PGPR) in improving crop productivity under stressful environments. *Biotechnology Advantages* 32(2): 429–48. <https://doi.org/10.1016/j.biotechadv.2013.12.005> PMID: 24380797
114. Nwodo U, Green E, Okoh A (2012) Bacterial EPS: functionality and prospects. *International Journal Molecular Science* 13: 14002–015.
115. Singh BK, Trivedi P (2017) Microbiome and the future for food and nutrient security. *Microbial Biotechnology* 10(1): 50–53. <https://doi.org/10.1111/1751-7915.12592> PMID: 28074557
116. Wischmeyer PE, Mc Donald D, Knight R (2016) Role of the microbiome, probiotics, and symbiosis therapy in critical illness. *Critical Care* 22(4): 347–54.
117. Briganti F, Pessione E, Giunta C, Scozzafava A (1997) Purification, biochemical properties and substrate specificity of a catechol 1, 2-dioxygenase from a phenol degrading *Acinetobacter radioresistens*. *FEBS Letters* 416: 61–64. [https://doi.org/10.1016/s0014-5793\(97\)01167-8](https://doi.org/10.1016/s0014-5793(97)01167-8) PMID: 9369233
118. Priyadharshini S, Gopinath V, Priyadharshini NM, Ali DM, Velusamy P (2012) Synthesis of anisotropic silver nanoparticles using novel strain *Bacillus flexus* and its biomedical application. *Colloids and Surfaces B: Biointerfaces* 102: 232–37. <https://doi.org/10.1016/j.colsurfb.2012.08.018> PMID: 23018021
119. Saravanan M, Vemu AK, Barik SK (2011) Rapid biosynthesis of silver nanoparticles from *Bacillus megaterium* (NCIM 2326) and their antibacterial activity or multi-drug resistant clinical pathogens. *Biointerfaces* 88: 325–31. <https://doi.org/10.1016/j.colsurfb.2011.07.009> PMID: 21798729
120. Singh P, Kim YJ, Singh H, Wang C, Hwang KH, Farh ME-A, Yang DC (2015) Biosynthesis, characterization, and antimicrobial applications of silver nanoparticles. *International Journal of Nanomedicine* 10: 2567–77. <https://doi.org/10.2147/IJN.S72313> PMID: 25848272
121. Mueller M, Nidetzky B (2010) Orthophosphate binding at the dimer interface of *Corynebacterium calluna* starch phosphorylase: mutational analysis of its role for activity and stability of the enzyme. *BMC Biochemistry* 11: 8–11. <https://doi.org/10.1186/1471-2091-11-8> PMID: 20113461
122. Chatterjee C, Bhattacharyya R, Sarkar S (2018) Characterize heavy metal tolerant rhizospheric sewage bacteria isolated from Tolly nullah (with special emphasis on strain *Microbacterium radiodurans* K12016). *International Journal of Engineering, Science and Mathematics* 4(1): 84–96.
123. Maoka T, Yasui H, Ohmori A, Tokuda H, Suzuki N, Osawa A, et al. (2013) Anti-oxidative, anti-tumour-promoting, and anti-carcinogenic activities of adonirubin and adonixanthin. *Journal of Oleo Science* 62: 181–86. <https://doi.org/10.5650/jos.62.181> PMID: 23470446
124. Coda R, Rizzello CG, Cagno RD, Trani A, Cardinali G, Gobetti M (2012) Antifungal activity of *Meyerozyma guilliermondii*: identification of active compounds synthesized during dough fermentation and their effect on long-term storage of wheat bread. *Food Microbiology* 8: 184–96. <https://doi.org/10.1016/j.fm.2012.09.023> PMID: 23200658
125. Silva MG, Furtado NAJC, Pupo MT, Fonseca MJV, Said S, da Silva Filho AA, et al. (2004) Antibacterial activity from *Penicillium corylophilum*. *Microbiological Research* 159: 317–22. <https://doi.org/10.1016/j.micres.2004.06.003> PMID: 15646377
126. Hemath NKS, Gaurav K, Karthik L, Bhaskara RKV (2010) Extracellular biosynthesis of silver nanoparticles using the filamentous fungus *Penicillium* spp. *Archives of Applied Sciences Research* 2: 161–67.
127. Ramesh A, Sharma SK, Sharma MP, Yadav N, Joshi OP (2013) Inoculation of zinc solubilizing *Bacillus aryabhatai* strains for improved growth, mobilization and biofortification of zinc in soybean and wheat cultivated in Vertisols of central India. *Applied Soil Ecology* 73: 87–96.
128. Plociniczak T, Sinkkonen A, Romantschuk M, Sulowicz S, Piotrowska-Seget Z (2016) Rhizospheric bacterial strain *Brevibacterium casei* MH8a colonizes plant tissues and enhances Cd, Zn, Cu phytoextraction by white mustard. *Frontiers in Plant Science*. pp. 251–255. <https://doi.org/10.3389/fpls.2016.00251> PMID: 27014286

129. Pasquarelli F, Spera A, Cantarella L, Cantarella M (2015) Biodegradation of bromoxynil using the cascade enzymatic system nitrile hydratase/amidase from *Microbacterium imperial* CBS 498–74. Comparison between free enzymes and resting cells. *RSC Advances* 46: 201–09.
130. Lal S, Tabacchioni S (2009) Ecology and biotechnological potential of *Paenibacillus polymyxa*: mini review. *Indian Journal of Microbiology* 49: 2–10. <https://doi.org/10.1007/s12088-009-0008-y> PMID: 23100748
131. Nunes C, Usall J, Teixido N, Fons E, Vinas I (2002) Post-harvest biological control by Patoea agglomerans (CPA-2) on Golden Delicious apples. *Journal of Applied Microbiology* 92: 247–55. <https://doi.org/10.1046/j.1365-2672.2002.01524.x> PMID: 11849352
132. Rezzonico F, Binder C, Defago G, Moenne-Loccoz Y (2005) The Type III secretion system of biocontrol *Pseudomonas fluorescens* KD target the phytopathogenic chromista *Pythium ultimum* and promotes cucumber protection. *MPMI* 9: 991–1001.
133. Granada SD, Bedoya-Perez JC, Scherlach K, Hertweck C (2016) *Serratia marcescens* metabolites are promising candidates for biocontrol of avocado pathogens. *Planta Med* 82: 1–381. <https://doi.org/10.1055/s-0035-1568212> PMID: 26756816
134. Chi Z, Wang F, Chi Z, Yue L, Liu G, Zhang T (2009) Bioproducts from *Aurobasidium pullulans*, a biotechnologically important yeast. *Applied Microbiology and Biotechnology* 82: 793–804. <https://doi.org/10.1007/s00253-009-1882-2> PMID: 19198830
135. Khan SA, Hamayun M, Yoon H, Kim H, Suh S, Hwang S, et al. (2008) Plant growth promotion and *Penicillium citrinum*. *BMC Microbiology* 8: 231–36. <https://doi.org/10.1186/1471-2180-8-231> PMID: 19099608
136. Su X, Zhang Q, Hu J, Hashmi MZ, Ding L, Shen C (2014) Enhanced degradation of biphenyl from PCB-contaminated sediments: the impact of extracellular organic matter from *Micrococcus luteus*. *Applied Microbiology and Biotechnology* 99: 1989–2000. <https://doi.org/10.1007/s00253-014-6108-6> PMID: 25301582
137. Samanta SK, Singh OV, Jain RK (2002) Polycyclic aromatic hydrocarbons: environmental pollution and bioremediation. *Trends in Biotechnology* 20: 243–48. [https://doi.org/10.1016/s0167-7799\(02\)01943-1](https://doi.org/10.1016/s0167-7799(02)01943-1) PMID: 12007492
138. Lalucat J, Bennasar A, Bosch R, Garcia-Valdes E, Palleroni NJ (2006) Biology of *Pseudomonas stutzeri*. *Microbiology and Molecular Biology Reviews*. pp. 510–47. <https://doi.org/10.1128/MMBR.00047-05> PMID: 16760312
139. Zalar P, Gostincar C, De Hoog GS, Ursic V, Sudhadham M, Gunde-Cimerman N (2008) Redefinition of *Aurobasidium pullulans* and its varieties. *Studies in Mycology* 61: 21–38. <https://doi.org/10.3114/sim.2008.61.02> PMID: 19287524
140. David B, Wolfender J-L, Dias DA (2014) The pharmaceutical industry and natural products: historical status and new trends. *Phytochemistry Review*. pp. 354–67.
141. Rodrigues J, Canet A, Rivera I, Osorio NM, Sandoval G, Valero F, et al. (2016) Biodiesel production from crude *Jatropha* oil catalysed by non-commercial immobilized heterologous *Rhizopus oryzae* and *Carica papaya* lipases. *Bioresource Technology* 213: 88–95. <https://doi.org/10.1016/j.biortech.2016.03.011> PMID: 26980626
142. Adukwu EC, Bowles M, Edwards-Jones V, Bone H (2016) Antimicrobial activity, cytotoxicity and chemical analysis of lemongrass essential oil (*Cymbopogon flexuosus*) and pure citral. *Applied Microbiology Biotechnology* 100: 9619–27. <https://doi.org/10.1007/s00253-016-7807-y> PMID: 27562470
143. Chen L, Zhang Q-Y, Jia M, Ming Q-L, Yue W, Rahman K, Qin L-P, et al. (2014) Endophytic fungi with antitumor activities: their occurrence and anticancer compounds. *Critical Review of Microbiology* 1–20. <https://doi.org/10.3109/1040841X.2014.959892> PMID: 25343583
144. Quinto CA, Mohindra P, Tong S, Bao G (2015) Multifunctional superparamagnetic iron oxide nanoparticles for combined chemotherapy and hyperthermia cancer treatment. *Nanoscale* 0: 1–3. <https://doi.org/10.1039/c5nr02718g> PMID: 26154916
145. Ahmed NH, Baruah FK, Grover RK (2017) *Staphylococcus hominis* subsp. *Novobiosepticus*, an emerging multidrug-resistant bacterium, as a causative agent of septicemia in cancer patients. *Indian Journal of Medical Research* 146(3): 420–25. [https://doi.org/10.4103/ijmr.IJMR\\_1362\\_15](https://doi.org/10.4103/ijmr.IJMR_1362_15) PMID: 29355151
146. Dixit RW, Malaviya D, Pndiyan K, Singh UB, Sahu A, Shukla R, et al. (2015) Bioremediation of heavy metals from soil and aquatic environments: an overview of principles and criteria of fundamental processes. *Sustainability* 7: 2189–212.
147. Singn R, Singh P, Sharma R (2013) Microorganism as a tool of bioremediation technology for cleaning environment: a review. *Proceedings of the International Academy of Ecology and Environmental Sciences* 4(1): 1–6.

148. Thomsen ST, Londono JEG, Ambye-Jensen M, Heiske S, Kadar Z, Meyer AS (2016) Combination of ensiling and fungal delignification as effective wheat straw pretreatment. *Biotechnologies Biofuels* 9 (16): 24–34. <https://doi.org/10.1186/s13068-016-0437-x> PMID: 26819628
149. Aransiola EF, Ojumu TV, Oyekola OO, Madzimbamuto TF, Ikhu-Omoregbe DIO (2014) A review of current technology for biodiesel production: state of the art. *Biomass and Bioenergy* 61: 276–97.
150. Crook B, Gawn JM, Swan JRM (2016) Bacteria, viruses and other bioaerosols in the workplace. Flannigan B, Samson RA, Miller JD (2017) In: *Microorganisms in home and indoor work environments*. 2<sup>nd</sup> edition. New York: CRC Press. 6000 Broken Sound Parkway NW, Suite 300. Boca Raton.
151. Adams RI, Bhangar S, Pasut W, Arens EA, Taylor JW, Lindow SE, et al. (2015) Chamber bioaerosol study: outdoor air and human occupants as sources of indoor airborne microbes. *PLOS ONE* 10: 29–41. <https://doi.org/10.1371/journal.pone.0128022> PMID: 26024222
152. Wu B, Meng K, Wei L, Cai Y, Chai T (2017) Seasonal fluctuations of microbial aerosol in live poultry markets and the detection of endotoxins. *Frontiers Microbiology*: 69–78.
153. Zhen Q, Deng Y, Wang Y, Wang X, Zhang H, Sun X, Ouyang Z (2017) Meteorological factors had more impact on airborne bacterial communities than air pollutants. *Science of the Total Environment* 601: 703–12. <https://doi.org/10.1016/j.scitotenv.2017.05.049> PMID: 28577405
154. Fisher MC, Henk DA, Briggs CJ, Brownstein JS, Madoff LC, McCraw SL, et al. (2012) Emerging fungal threats to animal, plant and ecosystems' health. *Nature* 484: 186–94. <https://doi.org/10.1038/nature10947> PMID: 22498624
155. Brown GD, Denning DW, Gow NAR, Levitz SM, Netea MG, White TC (2012) Hidden killers: human fungal infections. *Science Translated Medicine* 4: 165–72. <https://doi.org/10.1126/scitranslmed.3004404> PMID: 23253612
156. Lin SJ, Schranz J, Teutsch SM (2001) Aspergillosis case-fatality rate: systematic review of the literature. *Clinical Infectious Disease* 32: 358–66. <https://doi.org/10.1086/318483> PMID: 11170942
157. Yu OHY, Keet AWW, Sheppard DC, Brewer T (2010) Articular aspergillosis: case report and review of the literature. *International Journal of Infectious Diseases* 14: 433–35. <https://doi.org/10.1016/j.ijid.2009.05.012> PMID: 19656708
158. Rosa R, Mills J, Munoz-Price LS (2015) Clinical and microbiological characteristics of *Acinetobacter lwoffii* Bacteremia compared with *Acinetobacter baumannii*. *Open Forum Infectious Diseases* 2: 1780–90.
159. Mascarenhas dos Santos AC, Jie R, Godoy HA, Alves M, Pombert J-F (2018) Complete genome sequences of the potential zoonotic pathogens *Staphylococcus felis* and *Staphylococcus kloosii*. *American Society for Microbiology* 6(20): 404–18. <https://doi.org/10.1128/genomeA.00404-18> PMID: 29773625
160. Wong D, Nielsen TB, Bonomo RA, Pantapalangkoor P, Luna B, Spellberg B (2017) Clinical and pathophysiological overview of *Acinetobacter* infections: a century of challenges. *American Society for Microbiology* 30(1): 409–48. <https://doi.org/10.1128/CMR.00058-16> PMID: 27974412
161. Choi O, Lee Y, Kang B, Bae J, Kim S, Kim J (2018) Aversion centre blackening of muskmelon fruit caused by *Pseudomonas oryzae*, an opportunistic pathogen of humans and warm-blooded animals. *International Journal of Food Microbiology* 291: 1–4. <https://doi.org/10.1016/j.ijfoodmicro.2018.11.003> PMID: 30419473
162. Savini V, Catvittello C, Bianco A, Balbinot A, Antonio DD (2009) Epidemiology, pathogenicity and emerging resistance in *Staphylococcus pasteurii*: from mammals and lamprey, to man. *Recent Patents on Anti-Infective Drug Discovery* 4: 123–29. <https://doi.org/10.2174/157489109788490352> PMID: 19519547
163. Pantucek R, Svec P, Dajcs JJ, Machova I, Cernohlavkova J, Sedo O, et al. (2013) *Staphylococcus petrasii* sp. nov. including *S. petrasii* subsp. *petrasii* subsp. nov. and *S. petrasii* subsp. *croceilyticus* subsp. nov., isolated from human clinical specimens and human ear infections. *Systematic and Applied Microbiology* 36: 90–95. <https://doi.org/10.1016/j.syapm.2012.11.004> PMID: 23318093
164. Mohan B, Zaman K, Anad N, Taneja N (2017) *Aerococcus viridans*: a rare pathogen causing urinary tract infection. *Journal of Clinical and Diagnostic Research* 11 (1): 91–95. <https://doi.org/10.7860/JCDR/2017/23997.9229> PMID: 28273968
165. Quinn L, Ailsworth M, Matthews E, Kellams A, Shirley D-A (2018) *Serratia marcescens* colonization causing pink breast milk and pink diapers: a case report and literature review. *Breastfeeding Medicine* 13(5): 629–48. <https://doi.org/10.1089/bfm.2018.0002> PMID: 29708771
166. Trivedi MK, Branton A, Trivedi D, Nayak G, Mondal SC, Jana S (2015) Antimicrobial sensitivity, biochemical characteristics and biotyping of *Staphylococcus saprophyticus*: an impact on biofield energy treatment. *Journal of Women's Health Care* 4(6): 270–276.

167. Ronning HT, Madslie EH, Asp TN, Granum PE (2015) Identification and quantification of lichenysin: a possible source of food poisoning. *Food Additives & Contaminants: Part A* 32(12): 2120–2130. <https://doi.org/10.1080/19440049.2015.1096967> PMID: 26414385
168. Garg S (2017) *Staphylococcus cohnii*: not so innocuous. *Journal of Acute Disease* 6(5): 239–40.
169. Shields BE, Tschetter AJ, Wanat KA (2016) *Staphylococcus simulans*: an emerging cutaneous pathogen. *JAAD Case Reports* 2(6): 428–30. <https://doi.org/10.1016/j.jcdr.2016.08.015> PMID: 27957522
170. Bal ZS, Sen S, Karapinar DY, Aydemir S, Vardar F (2015) The first reported catheter-related *Brevibacterium casei* bloodstream infection in a child with acute leukaemia and review of literature. *Brazil Journal of Infectious Disease* 19(2): 213–15.
171. Otto M (2013) *Staphylococcus epidermidis* Pathogenesis. *Molecular Biology* 1106: 17–31.
172. Novakova D, Sedlacek I, Pantucek R, Stetina V, Svec P, Petras P (2006) *Staphylococcus equorum* and *Staphylococcus succinus* isolated from human clinical specimens. *Journal of Medical Microbiology* 55: 523–28. <https://doi.org/10.1099/jmm.0.46246-0> PMID: 16585638
173. Rafferty B, Dolgilevich S, Kalachikov S, Morozova I, Ju J, Whittier S, Nowygrod R, Kozarov E (2011) Cultivation of *Enterobacter Hormaechei* from human atherosclerotic tissue. *Journal of Atherosclerosis and Thrombosis* 18(1): 72–82. <https://doi.org/10.5551/jat.5207> PMID: 20972353
174. Czekaj T, Ciszewski M, Szewczyk M (2015) *Staphylococcus haemolyticus*: an emerging threat in the twilight of the antibiotics age. *Microbiology* 161: 2061–68. <https://doi.org/10.1099/mic.0.000178> PMID: 26363644
175. Athan E (2014) The characteristics and outcome of infective Endocarditis involving implantable cardiac devices. *Current Infectious Diseases Reports* 16: 446–50. <https://doi.org/10.1007/s11908-014-0446-5> PMID: 25348742
176. Dimitriadi D, Charitidou C, Charvalos E (2014) Urinary tract infection due to beta-lactams-resistant *Staphylococcus warneri*: a case report. *The International Arabic Journal of Antimicrobial Agents* 4(4): 760–65.
177. Dehghan-Niri M, Rahlmlan H, Babaelzad V (2015) *Cryptococcus uzbekistanensis* causing canker on stone fruit trees. *New Disease Reports* 31(13): 2044–45.
178. Sheng-Yuan R, Jung-Yien C, Yi-Chung H, Po-Ren H. Catheter-related fungemia caused by *Candida intermedia*. *International Journal of Infectious Diseases* 14: 147–49.
179. Han S, Kim H, Ryu JC, Chung YW, Seo JA, Ryu JH (2018) NOX2-mediated neutrophil extracellular traps (NETs) are responsible for lung injury induced by *Rhizopus Oryzae* and *Mucor circinelloides* infection. *American Journal of Respiratory and Critical Care Medicine* 197: 14–26.
180. Liu BH, Lei CW, Zhang AY, Pan Y, Kong LH, Xiang R, et al. (2017) Colocation of the multi resistance gene *cf*r and the Fosfomycin resistance gene *fosD* on a Noel Plasmid in *Staphylococcus arlettae* from a chicken farm. *Antimicrobial Agents and Chemotherapy* 61(12): 1388–97.
181. Sonjak S, Frisvad JC, Gunde-Cimerman N (2005) Comparison of secondary metabolite production by *Penicillium crustosum* strains, isolated from Artic and other various ecological niches. *FEMS Microbiology Ecology* 53(1): 51–60. <https://doi.org/10.1016/j.femsec.2004.10.014> PMID: 16329929
182. Andreani NA, Martino ME, Fasolato L, Carraro L, Montemurro F, Mioni R, et al. (2014) Tracking the blue: AMLST approach to characterise the *Pseudomonas fluorescens* group. *Food Microbiology* 39: 116–26. <https://doi.org/10.1016/j.fm.2013.11.012> PMID: 24387861
183. Decimo M, Cabeza MC, Ordonez JA, De Noni I, Brasca M (2018) Volatile organic compounds associated with milk spoilage by psychotropic bacteria. *International Journal of Dairy Technology* 71(3): 593–601.
184. Bragoszewska E, Mainka A, Pastuszka JS (2016) Bacterial and fungal aerosols in rural nursery schools in southern Poland. *Atmosphere* 7(142): 16–32.
185. Kim NY, Kim YR, Kim MK, Cho DW, Kim J (2007) Isolation and characterization of airborne bacteria and fungi in indoor environment of elementary schools. *Korean Journal of Microbiology* 43: 193–200.
186. Kubera L, Studzinska J, Dokladna W, Malecka-Adamowicz M, Donderski W (2015) Microbiological air quality in some kindergartens and antibiotic resistance of bacteria of the *Staphylococcus* spp. genus. *Medicine Press* 66: 49–56. PMID: 26016045
187. Carvalhais V, Cerveira F, Vilanova M, Cerca N, Vitorino R (2015) An immunoproteomic approach for characterization of dormancy within *Staphylococcus epidermidis* biofilms. *Molecular Immunology* 65: 429–35. <https://doi.org/10.1016/j.molimm.2015.02.024> PMID: 25749707
188. Abraha H, Hadish G, Aligaz B, Eyas G, Workelule K (2018) Antimicrobial resistance profile of *Staphylococcus aureus* isolated from raw cow's milk and fresh fruit juice in Mekelle, Tigray, and Ethiopia. *Journal of Veterinary Medicine and Animal Health* 10(4): 106–113.

189. Sosa MJ, Cordoba JJ, Diaz C, Rodriguez M, Bermudez E, Asensio MA, et al. (2002) Production of Cyclopiazonic Acid by *Penicillium commune* isolated from dry-cured ham on a meat extract-based substrate. *Journal of Food Protection* 65: 988–92. <https://doi.org/10.4315/0362-028x-65.6.988> PMID: 12092733
190. Wang N, Yuan L, Sadiq FA, He G (2019) Inhibitory effect of *Lactobacillus plantarum* metabolites against biofilm formation by *Bacillus licheniformis* isolated from milk powder products. *Food Control* 106: 172–183.
191. Ferrario M, Alzamora SM, Guerrero S (2015) Study of the inactivation of spoilage microorganisms in apple juice by pulsed light and ultrasound. *Food Microbiology* 46: 635–642. <https://doi.org/10.1016/j.fm.2014.06.017> PMID: 25475338
192. Groot MN, Abee T, Van Bokhorst-van de Veen H (2018) Inactivation of conidia from three *Penicillium* spp. isolated from fruit juices by conventional and alternative mild preservation technologies and disinfection treatments. *Food Microbiology* 9: 12–19.
193. Wigmann EF, Saccomori F, Bernardi AO, Frisvad JC, Copetti MV (2015) Toxigenic penicillia spoiling frozen chicken nuggets. *Food Research International* 67: 219–22.
194. Bentanzos-Cabrera G, Montes-Rubio PY, Fabela-Illescas HE, Belefant-Miller H, Cancino-Diaz JC (2015) Antibacterial activity of fresh pomegranate juice against clinical strains of *Staphylococcus epidermidis*. *Food & Nutritional Research* 59: 276–86.
195. Bhangar S, Huffman JA, Nazaroff WW (2014) Size-resolved fluorescent biological aerosol particle concentrations and occupant emissions in a university classroom. *Indoor Air* 24: 604–17. <https://doi.org/10.1111/ina.12111> PMID: 24654966
196. Bhangar S, Adams RI, Pasut W, Huffman JA, Arens EA, Taylor JW, et al (2015) Chamber bioaerosol study: human emissions of size-resolved fluorescent biological aerosol particles. *Indoor Air*. pp. 19–26.
197. Castillo JA, Staton SJR, Taylor TJ, Herches P, Hayes MA (2012) Exploring the feasibility of bioaerosol analysis as a novel fingerprinting technique. *Analytical and Bioanalytical Chemistry* 403: 15–26. <https://doi.org/10.1007/s00216-012-5725-0> PMID: 22311424
198. Hospodsky D, Qian J, Nazaroff WW, Yamamoto N, Bibby K, Rismani-Yazdi H, et al. (2012) Human occupancy as a source of indoor airborne bacteria. *PLOS ONE* 7: 31–43. <https://doi.org/10.1371/journal.pone.0034867> PMID: 22529946
199. Meadow JF, Altrichter AE, Kembel SW, Kline J, Mhuireach G, Moriyama M, et al. (2014) Indoor airborne bacterial communities are influenced by ventilation, occupancy, and outdoor air source. *Indoor Air* 24: 41–48. <https://doi.org/10.1111/ina.12047> PMID: 23621155
200. Meadow JF, Altrichter AE, Bateman AC, Stenson J, Brown G, Green JL, et al. (2015) Humans differ in their personal microbial cloud. *Peer Journal* 3: 44–52. <https://doi.org/10.7717/peerj.1258> PMID: 26417541
201. Morawska L (2006) Droplet fate in indoor environments, or can we prevent the spread of infection? *Indoor Air* 16: 335–47. <https://doi.org/10.1111/j.1600-0668.2006.00432.x> PMID: 16948710
202. Nazaroff WW (2016) Indoor bioaerosol dynamics. *Indoor Air*. pp. 61–78. <https://doi.org/10.1111/ina.12174> PMID: 25483392
203. Noble WC (1975) Dispersal of skin microorganisms. *Br Journal Dermatology* 93: 477–85. <https://doi.org/10.1111/j.1365-2133.1975.tb06527.x> PMID: 1103939
204. Qian J, Hospodsky D, Yamamoto N, Nazaroff WW, Peccia J (2012) Size-resolved emission rates of airborne bacteria and fungi in an occupied classroom. *Indoor Air* 22: 339–51. <https://doi.org/10.1111/j.1600-0668.2012.00769.x> PMID: 22257156
205. Qian J, Peccia J, Ferro AR (2014) Walking-induced particle resuspension in indoor environments. *Atmosphere Environment* 89: 464–81.
206. You R (2013) Measuring the short-term emission rates of particles in the “personal cloud” with different clothes and activity intensities in a sealed chamber. *Aerosol Air Quality Research* 13: 911–21.
207. Qian H, Zheng X (2018) Ventilation control for airborne transmission of human exhaled bio-aerosols in buildings. *Journal of Thoracic Disease* 10(19): 2295–2304. <https://doi.org/10.21037/jtd.2018.01.24> PMID: 30116608
208. Snyder AB, Worobo RW (2018) The incidence and impact of microbial spoilage in the production of fruit and vegetable juices as reported by juice manufacturers. *Food Control* 85: 144–150.
209. Shyamala R, Rao J (2015) Incidence of *Pseudomonas* species in urinary tract infection in a tertiary care hospital. *Journal of Microbiology and Biotechnology Research* 5(1): 11–13.
210. Moretto T, Langsrud S (2017) Residential bacteria on surfaces in the food industry and their implications for food safety and quality. *Comprehensive Reviews in Food Science and Food Safety* 16: 1022–42. <https://doi.org/10.1111/1541-4337.12283> PMID: 33371605

211. Calasso M, Ercolini D, Mancini L, Stellatio G, Minervini F, Di Cagno R, et al. (2016) Relationships among house, rind and core microbiotas during manufacture of traditional Italian cheeses at the same dairy plant. *Food Microbiology* 54: 115–26.
